# Supplementary material
Source: MDPI journal article supplement (https://www.mdpi.com/2227-9040/10/1/37)
Supplement: s1 [file s1 › chemosensors-1537032-supplementary.pdf]

## Supplementary Materials

### Contents

|                                                                                 |    |
|---------------------------------------------------------------------------------|----|
| 1. Syntheses .....                                                              | 2  |
| 1.1. General.....                                                               | 2  |
| 1.2. Synthesis of <b>TOA</b> , <b>TOA*</b> , <b>BO</b> and <b>BOA</b> .....     | 3  |
| 1.3. Synthesis of <b>TOT</b> .....                                              | 6  |
| 1.4. Synthesis of Styryl dyes.....                                              | 10 |
| 2. Spectroscopic characterization.....                                          | 16 |
| 3. Conversion of <b>TOA</b> and <b>TOT</b> in the cycloaddition reactions ..... | 18 |
| 4. Cellular studies .....                                                       | 19 |
| 4.1. Cell culture .....                                                         | 19 |
| 4.2. Effect of dyes on cell viability .....                                     | 19 |
| 4.3. Live-cell labeling .....                                                   | 20 |
| 4.4. Construction of HaloTag plasmids .....                                     | 21 |
| 4.5. Fluorescent confocal microscopy .....                                      | 21 |
| 5. NMR spectra .....                                                            | 22 |
| 6. References.....                                                              | 36 |

## 1. Syntheses

### 1.1. General

All starting materials were obtained from commercial suppliers (Sigma-Aldrich, Fluka, Merck, Alfa Aesar, Reanal, Molar Chemicals, Fluorochem) and used without further purification.

Analytical thin-layer chromatography (TLC) was performed on silica gel 60 F254 precoated aluminum TLC plates or aluminum oxide 60 F254 precoated aluminum TLC plates from Merck. Flash column chromatography was performed on a *Teledyne ISCO COMBI Flash Nextgen 300+* automated flash chromatographer with silica gel (25–40  $\mu\text{m}$ ) from Zeochem, aluminum oxide (activated, neutral, Brockmann I) or RediSep®Rf C18 High Performance GOLD column. Microwave reactions were performed in an *AntonPaar Monowave 400* reactor using sealed tubes with fast heating and then maintaining a constant temperature.

NMR spectra were recorded on a *Varian Inova* 500 MHz or a *Varian Inova* 300 MHz spectrometer. Chemical shifts ( $\delta$ ) are given in parts per million (ppm) using solvent signals as the reference for samples made in  $\text{CDCl}_3$ ,  $\text{CD}_3\text{OD}$ , acetone- $d_6$  or  $\text{DMSO}-d_6$ ; and using 1,4-dioxane as an internal reference for samples made in  $\text{D}_2\text{O}$ .

Analytical RP-HPLC-UV/Vis-MS experiments were performed on a *SHIMADZU LCMS-2020* system using a Phenomenex Kinetex EVO C18 column (50  $\times$  2.10 mm I.D.) with 2.6  $\mu\text{m}$  silica (100 Å pore size) as a stationary phase with a photodiode array UV/Vis (190–800 nm) and an ESI-MS detector. Linear gradient elution (0 min 0% B; 2.0 min 100% B; 2.5 min 100% B; 3.0 min 0% B; 4.0 min 0% B) with eluent A (95% water, 4.99 %MeCN, 0.1%  $\text{HCOOH}$ ) and eluent B (95% MeCN, 4.99% water, 0.1%  $\text{HCOOH}$ ) was used at a flow rate of 1.0 mL/min at 40°C. The samples were dissolved in the mixture of water and MeCN (1:1 V/V).

The exact masses were determined with an *Agilent 6230* time-of-flight mass spectrometer.

Every synthetic procedure with the involvement of azide group was carried out under light-free conditions and the products were stored in low-actinic glassware at  $-4^\circ\text{C}$ . Compounds TO, TO\*, Cy1<sup>1</sup> and Cy1A<sup>2</sup> were synthesized as described in the literature.

## 1.2. Synthesis of TOA, TOA\*, BO and BOA

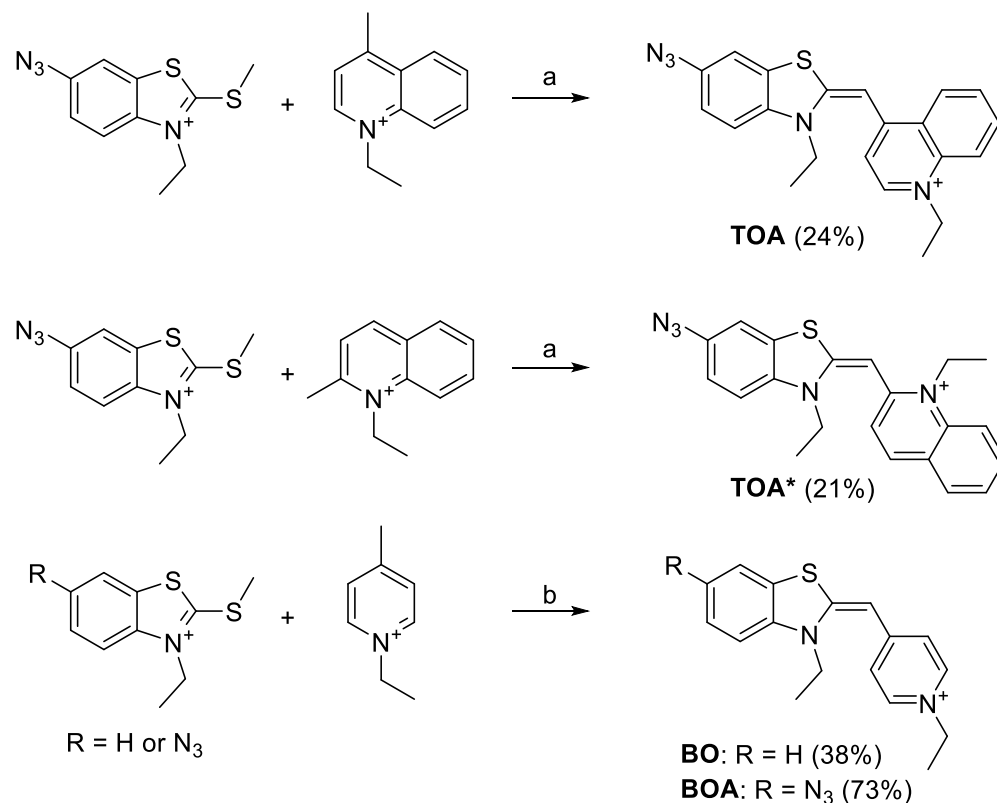

**Scheme S1.** a) Et<sub>3</sub>N, EtOH, 75 °C, 60 min b) Et<sub>3</sub>N, CH<sub>2</sub>Cl<sub>2</sub>, rt, 16 h.

General method for the synthesis of TOA and TOA\*

*N*-Ethyl-2-methyl-quinolinium iodide<sup>3</sup> or *N*-ethyl-4-methyl-quinolinium iodide<sup>4</sup> (100 mg, 0.33 mmol, 1.0 equiv.) was dissolved in 10 mL ethanol and *N*-ethyl-6-azido-2-methylsulfanylbenzothiazolium sulfate<sup>5</sup> (110 mg, 0.37 mmol, 1.1 equiv.) and triethylamine (37 mg, 51 μL, 0.37 mmol, 1.1 equiv.) were added to the solution. The mixture was stirred at 75 °C for 60 min in N<sub>2</sub> atmosphere. After cooling, the solid was filtered and washed with cold ethanol. The salt was dissolved in acetonitrile, 300 mg (1.84 mmol, 5.5 equiv.) ammonium-hexafluorophosphate and water was added to the solution. The acetonitrile was removed, the product was filtered, washed with water, and dried *in vacuo*. The product was used without further purification.

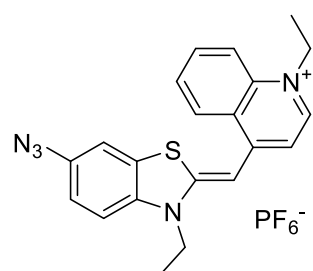

**4-((6-Azido-3-ethyl-1,3-benzothiazol-2(3H)-ylidene)methyl)-1-ethylquinolin-1-ium hexafluorophosphate(V) (TOA).**

Yield: 24% (41 mg, 0.079 mmol)

$^1\text{H}$  NMR (500 MHz, DMSO- $d_6$ )  $\delta$  8.80 (d,  $J$  = 8.6 Hz, 1H), 8.69 (d,  $J$  = 7.1 Hz, 1H), 8.17 (d,  $J$  = 9.2 Hz, 1H), 8.01 (t,  $J$  = 7.3 Hz, 1H), 7.93 (d,  $J$  = 2.1 Hz, 1H), 7.82 – 7.74 (m, 2H) [contained in this multiplet: 7.79 (d,  $J$  = 8.9 Hz, 1H), 7.78 (t,  $J$  = 7.6 Hz, 1H)], 7.41 – 7.34 (m, 2H) [contained in this multiplet: 7.38 (d,  $J$  = 7.2 Hz, 1H), 7.36 (dd,  $J$  = 8.9, 2.3 Hz, 1H)], 6.93 (s, 1H), 4.71 – 4.63 (m, 4H), 1.48 (t,  $J$  = 7.1 Hz, 3H), 1.37 (t,  $J$  = 7.0 Hz, 3H).

$^{13}\text{C}$  NMR (126 MHz, DMSO- $d_6$ )  $\delta$  158.7, 148.8, 144.0, 137.1, 136.9, 136.1, 133.3, 126.9, 125.9, 124.3, 119.7, 118.0, 113.8, 113.4, 108.3, 87.5, 49.5, 41.2, 14.7, 12.2.

HRMS:  $[\text{M}]^+$ : calcd for  $[\text{C}_{21}\text{H}_{20}\text{N}_5\text{S}]^+$ :  $m/z$  = 374.1434, found: 374.1432.

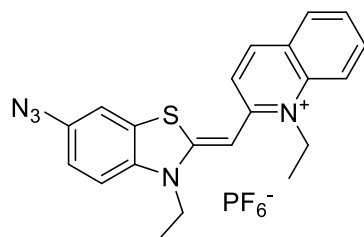

**2-((6-Azido-3-ethyl-1,3-benzothiazol-2(3H)-ylidene)methyl)-1-ethylquinolin-1-ium hexafluorophosphate(V) (TOA\*).**

Yield: 21 % (40 mg, 0.071 mmol)

$^1\text{H}$  NMR (500 MHz, DMSO- $d_6$ )  $\delta$  8.47 (d,  $J$  = 9.3 Hz, 1H), 8.13 (d,  $J$  = 8.9 Hz, 1H), 8.04 (d,  $J$  = 9.4 Hz, 2H), 7.93 (t,  $J$  = 7.4 Hz, 1H), 7.89 (d,  $J$  = 2.2 Hz, 1H), 7.80 (d,  $J$  = 8.9 Hz, 1H), 7.63 (t,  $J$  = 7.5 Hz, 1H), 7.35 (dd,  $J$  = 8.8, 2.2 Hz, 1H), 6.08 (s, 1H), 4.72 (q,  $J$  = 7.0 Hz, 2H), 4.56 (q,  $J$  = 7.0 Hz, 2H), 1.50 (t,  $J$  = 7.1 Hz, 3H), 1.38 (t,  $J$  = 7.1 Hz, 3H).

$^{13}\text{C}$  NMR (126 MHz, DMSO- $d_6$ )  $\delta$  160.6, 152.1, 140.0, 138.6, 137.3, 136.4, 133.7, 129.7, 125.7, 125.4, 124.2, 119.5, 118.6, 116.9, 113.9, 113.3, 84.9, 44.0, 41.5, 12.1, 11.8.

HRMS:  $[\text{M}]^+$ : calcd for  $[\text{C}_{21}\text{H}_{20}\text{N}_5\text{S}]^+$ :  $m/z$  = 374.1434, found: 374.1443.

General method for BO and BOA

A mixture of *N*-ethyl-4-methylpyridinium iodide<sup>6</sup> (100 mg, 0.40 mmol, 1.0 equiv.), *N*-ethyl-2-methylsulfanylbenzothiazolium ethylsulfate<sup>7</sup> (148 mg, 0.44 mmol, 1.1 equiv.) or *N*-ethyl-6-azido-2-methylsulfanylbenzothiazolium sulfate<sup>5</sup> (132 mg, 0.44 mmol, 1.1 equiv.) and triethyl-amine (81 mg, 112  $\mu\text{L}$ , 0.80 mmol, 2.0 equiv.) was stirred at rt overnight. Diethyl ether was added and the mixture was cooled to 0  $^\circ\text{C}$ . The solid was filtered and washed with cold ether. The salt was dissolved in acetonitrile, 326 mg (2.00 mmol, 5.0 equiv.) ammonium-hexafluorophosphate and water was added to the solution. The acetonitrile was removed, the product was filtered, washed with water and dried *in vacuo*. The product was used without further purification.

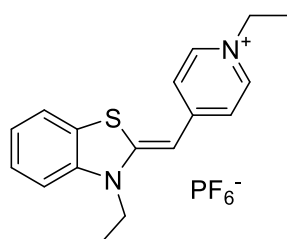

**1-Ethyl-4-((3-ethyl-1,3-benzothiazol-2(3H)-ylidene)methyl)pyridin-1-ium hexafluorophosphate(V) (BO).**

Yield: 38 % (66 mg, 0.152 mmol)

$^1\text{H}$  NMR (500 MHz, DMSO- $d_6$ )  $\delta$  8.39 (d,  $J$  = 6.0 Hz, 2H), 7.92 (d,  $J$  = 7.8 Hz, 1H), 7.60 (d,  $J$  = 8.1 Hz, 1H), 7.53 (t,  $J$  = 7.7 Hz, 1H), 7.44 (d,  $J$  = 5.7 Hz, 2H), 7.31 (t,  $J$  = 7.5 Hz, 1H),

6.32 (s, 1H), 4.32 (q,  $J = 7.0$  Hz, 2H), 4.26 (q,  $J = 7.3$  Hz, 2H), 1.44 (t,  $J = 7.0$  Hz, 3H), 1.31 (t,  $J = 6.5$  Hz, 3H).

$^{13}\text{C}$  NMR (126 MHz, DMSO- $d_6$ )  $\delta$  156.1, 150.5, 140.9, 139.5, 127.9, 123.50, 123.46, 122.6, 118.6, 111.7, 88.9, 53.0, 40.3, 16.0, 11.7.

HRMS:  $[\text{M}]^+$ : calcd for  $[\text{C}_{17}\text{H}_{19}\text{N}_2\text{S}]^+$ :  $m/z = 283.1264$ , found: 283.1270.

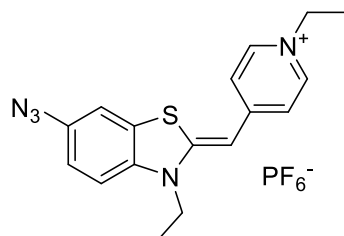

**4-((6-Azido-3-ethyl-1,3-benzothiazol-2(3H)-ylidene)methyl)-1-ethylpyridin-1-ium hexafluorophosphate(V) (BOA).**

Yield: 73 % (138 mg, 0.94 mmol)

$^1\text{H}$  NMR (500 MHz, DMSO- $d_6$ )  $\delta$  8.40 (d,  $J = 6.6$  Hz, 2H), 7.80 (d,  $J = 1.8$  Hz, 1H), 7.60 (d,  $J = 8.8$  Hz, 1H), 7.41 (d,  $J = 6.5$  Hz, 2H), 7.26 (dd,  $J = 8.3, 1.8$  Hz, 1H), 6.30 (s, 1H), 4.30 (q,  $J = 6.6$  Hz, 2H), 4.26 (q,  $J = 7.2$  Hz, 2H), 1.44 (t,  $J = 7.0$  Hz, 3H), 1.29 (t,  $J = 6.6$  Hz, 3H).

$^{13}\text{C}$  NMR (126 MHz, DMSO- $d_6$ )  $\delta$  155.9, 150.5, 141.0, 137.2, 135.1, 125.4, 119.2, 118.7, 113.3, 112.7, 89.2, 53.1, 40.6, 16.0, 11.8.

HRMS:  $[\text{M}]^+$ : calcd for  $[\text{C}_{17}\text{H}_{18}\text{N}_5\text{S}]^+$ :  $m/z = 324.1278$ , found: 324.1279.

### 1.3. Synthesis of TOT

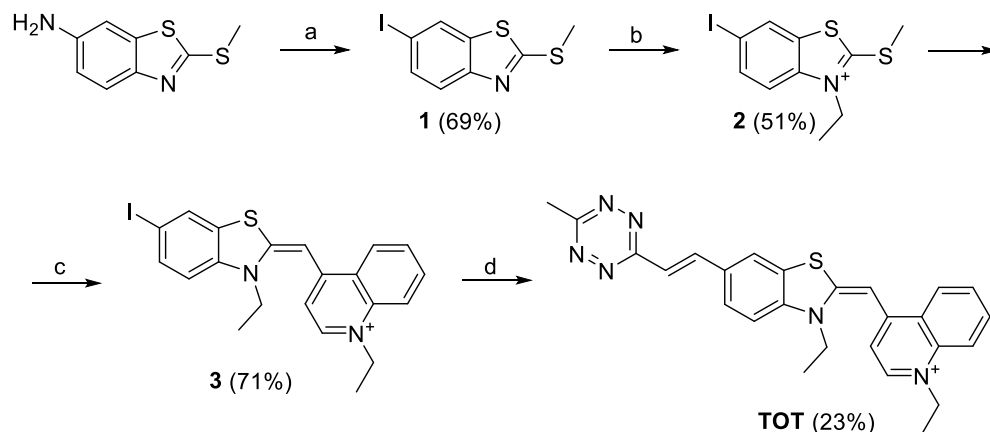

**Scheme S2.** a) 1.  $\text{NaNO}_2$ , HCl,  $\text{H}_2\text{O}$ ,  $0^\circ\text{C}$ , 10 min, 2. KI,  $40^\circ\text{C}$ , 20 min, b)  $(\text{EtO})_2\text{SO}_2$ ,  $100^\circ\text{C}$ , 16 h, c) *N*-ethyl-4-methyl-quinolinium iodide,  $\text{Et}_3\text{N}$ ,  $\text{CH}_2\text{Cl}_2$ , rt, 16 h, d) 2-(6-methyl-1,2,4,5-tetrazin-3-yl)ethyl methanesulfonate,  $\text{Pd}_2(\text{dba})_3$ , QPhos,  $\text{Cy}_2\text{NMe}$ , DMF,  $100^\circ\text{C}$  MW, 60 min.

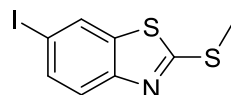

**6-Iodo-2-(methylsulfany)benzo[d]thiazole (1).**

To a solution of 6-amino-2-(methylsulfany)benzothiazole<sup>5</sup> (1.96 g, 10 mmol, 1.0 equiv.) in 10 mL 20% aqueous HCl cooled to  $0^\circ\text{C}$  was added a solution of  $\text{NaNO}_2$  (0.76 g, 11 mmol, 1.1 equiv.) in 4 mL water and the mixture was stirred for 10 min. A solution of KI (1.83 g, 11 mmol, 1.1 equiv.) dissolved in 3 mL water was added, the reaction mixture was let to warm up to rt, then it was stirred at  $40^\circ\text{C}$  for 20 min. After cooling down the

reaction mixture was extracted with CH<sub>2</sub>Cl<sub>2</sub> (3 x 20 mL), the combined organic phase was washed with 5% aqueous NaHSO<sub>3</sub> solution and water, dried with MgSO<sub>4</sub>, filtered and evaporated. The crude product was purified by flash column chromatography on silica using hexanes/EtOAc as eluent.

Yield: 69 % (2.12 g, 6.9 mmol)

<sup>1</sup>H NMR (500 MHz, CDCl<sub>3</sub>) δ 8.05 (d, *J* = 1.7 Hz, 1H), 7.68 (dd, *J* = 8.5, 1.2 Hz, 1H), 7.58 (d, *J* = 8.5 Hz, 1H), 2.78 (s, 3H).

<sup>13</sup>C NMR (126 MHz, CDCl<sub>3</sub>) δ 169.0, 152.8, 137.3, 135.3, 129.5, 122.9, 88.1, 16.1.

MS: [M+H]<sup>+</sup>: calcd for [C<sub>8</sub>H<sub>7</sub>INS<sub>2</sub>]<sup>+</sup>: *m/z* = 308, found: 308.

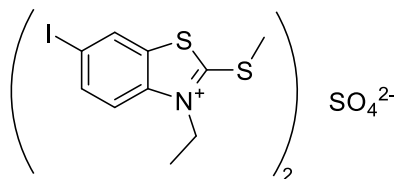

### 3-Ethyl-6-iodo-2-(methylsulfanyl)-1,3-benzothiazolium sulfate (2).

A mixture of **1** (924 mg, 3 mmol, 1.0 equiv.) and diethyl sulfate (1.54 g, 1.3 mL, 10 mmol, 3.3 equiv.) was stirred at 100 °C for 16 h. After cooling to rt acetone and diethyl ether was added and the mixture was stirred until the product solidified. The precipitate was filtered and washed with acetone. The product was used without further purification.

Yield: 51% (588 mg, 1.53 mmol)

<sup>1</sup>H NMR (500 MHz, D<sub>2</sub>O) δ 8.49 (d, *J* = 1.5 Hz, 1H), 8.14 (dd, *J* = 8.9, 1.5 Hz, 1H), 7.76 (d, *J* = 8.9 Hz, 1H), 4.62 (q, *J* = 7.4 Hz, 2H), 3.08 (s, 3H), 1.50 (t, *J* = 7.4 Hz, 3H).

<sup>13</sup>C NMR (126 MHz, D<sub>2</sub>O) δ 182.1, 141.7, 138.9, 132.2, 130.7, 116.8, 91.7, 46.6, 18.5, 12.0.

MS: [M]<sup>+</sup>: calcd for [C<sub>10</sub>H<sub>11</sub>INS<sub>2</sub>]<sup>+</sup>: *m/z* = 336, found: 336.

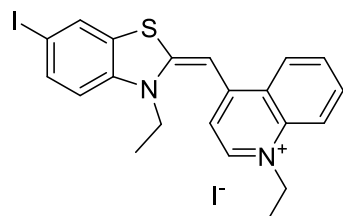

### 1-Ethyl-4-((3-ethyl-6-iodo-1,3-benzothiazol-2(3H)-ylidene)methyl)quinolin-1-ium iodide (3).

A mixture of *N*-ethyl-4-methylquinolinium iodide<sup>4</sup> (425 mg, 1.42 mmol, 1.0 equiv.), **2** (546 mg, 1.42 mmol, 1.0 equiv.) and triethyl-amine (315 mg, 433 μL, 3.13 mmol, 2.2 equiv.) was stirred at rt overnight. Diethyl ether was added and the mixture was cooled to 0 °C. The solid was filtered and washed with cold ether. The product was used without further purification.

Yield: 71% (592 mg, 1.01 mmol)

<sup>1</sup>H NMR (500 MHz, DMSO-*d*<sub>6</sub>) δ 8.80 (d, *J* = 8.6 Hz, 1H), 8.72 (d, *J* = 7.1 Hz, 1H), 8.42 (d, *J* = 1.7 Hz, 1H), 8.19 (d, *J* = 8.8 Hz, 1H), 8.03 (t, *J* = 7.9 Hz, 1H), 7.90 (dd, *J* = 8.6, 1.8 Hz, 1H), 7.79 (t, *J* = 7.6 Hz, 1H), 7.56 (d, *J* = 8.7 Hz, 1H), 7.41 (d, *J* = 7.1 Hz, 1H), 6.92 (s, 1H), 4.67 (q, *J* = 7.2 Hz, 2H), 4.62 (q, *J* = 7.0 Hz, 2H), 1.49 (t, *J* = 7.1 Hz, 3H), 1.36 (t, *J* = 7.1 Hz, 3H).

<sup>13</sup>C NMR (126 MHz, DMSO-*d*<sub>6</sub>) δ 158.4, 149.0, 144.2, 139.5, 136.8, 136.5, 133.4, 130.8, 127.0, 126.2, 125.9, 124.4, 118.0, 114.4, 108.7, 87.4, 49.6, 45.8, 14.7, 12.1.

HRMS: [M]<sup>+</sup>: calcd for [C<sub>21</sub>H<sub>20</sub>IN<sub>2</sub>S]<sup>+</sup>: *m/z* = 459.0387, found: 459.0391.

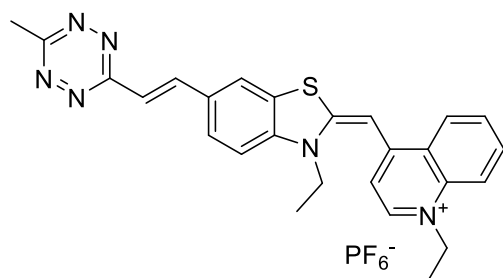

**1-Ethyl-4-((3-ethyl-6-(2-(6-methyl-1,2,4,5-tetrazin-3-yl)vinyl)-1,3-benzothiazol-2(3H)-ylidene)methyl)quinolin-1-ium hexafluorophosphate(V) (TOT).**

In a dried microwave pressure tube with magnetic stir bar was dissolved **3** (58.6 mg, 0.1 mmol, 1.0 equiv.), 2-(6-methyl-1,2,4,5-tetrazin-3-yl)ethyl methanesulfonate<sup>8</sup> (65.6 mg, 0.3 mmol, 3.0 equiv.), *N,N*-dicyclohexylmethylamine (98 mg, 107  $\mu$ L, 0.5 mmol, 5 equiv.) and tris(dibenzylideneacetone)dipalladium(0) (Pd<sub>2</sub>(dba)<sub>3</sub>, 9.2 mg, 0.01 mmol, 0.1 equiv.) and 1,2,3,4,5-pentaphenyl-1'-(di-*tert*-butylphosphino)ferrocene (QPhos, 7.1 mg, 0.01 mmol, 0.1 equiv.) in 5 mL dimethylformamide. The mixture was heated in a microwave reactor at 100 °C for 60 min. The solvent was evaporated in vacuo and the crude product was purified by flash column chromatography on C18 silica using water/MeOH containing 0.1% TFA as eluent. Ammonium hexafluorophosphate was added to the product containing fraction and MeOH was removed. The precipitated product was collected by filtration, washed with water and dried.

Yield: 23% (14 mg, 0.023 mmol)

<sup>1</sup>H NMR (500 MHz, DMSO-*d*<sub>6</sub>)  $\delta$  8.82 (d, *J* = 8.5 Hz, 1H), 8.74 (d, *J* = 7.1 Hz, 1H), 8.54 (d, *J* = 1.6 Hz, 1H), 8.31 (d, *J* = 16.2 Hz, 1H), 8.20 (d, *J* = 8.8 Hz, 1H), 8.13 (dd, *J* = 8.6, 1.7 Hz, 1H), 8.03 (t, *J* = 7.7 Hz, 1H), 7.86 – 7.77 (m, 2H) [contained in this multiplet: 7.83 (d, *J* = 9.0 Hz, 1H), 7.80 (t, *J* = 7.7 Hz, 2H)], 7.69 (d, *J* = 16.2 Hz, 1H), 7.50 (d, *J* = 7.1 Hz, 1H), 6.99 (s, 1H), 4.74 – 4.65 (m, 4H), 2.96 (s, 3H), 1.51 (t, *J* = 7.2 Hz, 3H), 1.42 (t, *J* = 7.1 Hz, 3H).

<sup>13</sup>C NMR (126 MHz, DMSO-*d*<sub>6</sub>)  $\delta$  166.0, 164.1, 158.4, 149.0, 144.3, 140.7, 138.2, 136.8, 133.4, 131.4, 128.8, 127.0, 125.9, 124.8, 124.5, 122.0, 120.9, 118.1, 112.8, 109.0, 88.0, 49.7, 41.2, 20.8, 14.7, 12.2.

HRMS: [M]<sup>+</sup>: calcd for [C<sub>26</sub>H<sub>25</sub>N<sub>6</sub>S]<sup>+</sup>: *m/z* = 453.1856, found: 453.1857.

#### 1.4. Synthesis of Styryl dyes

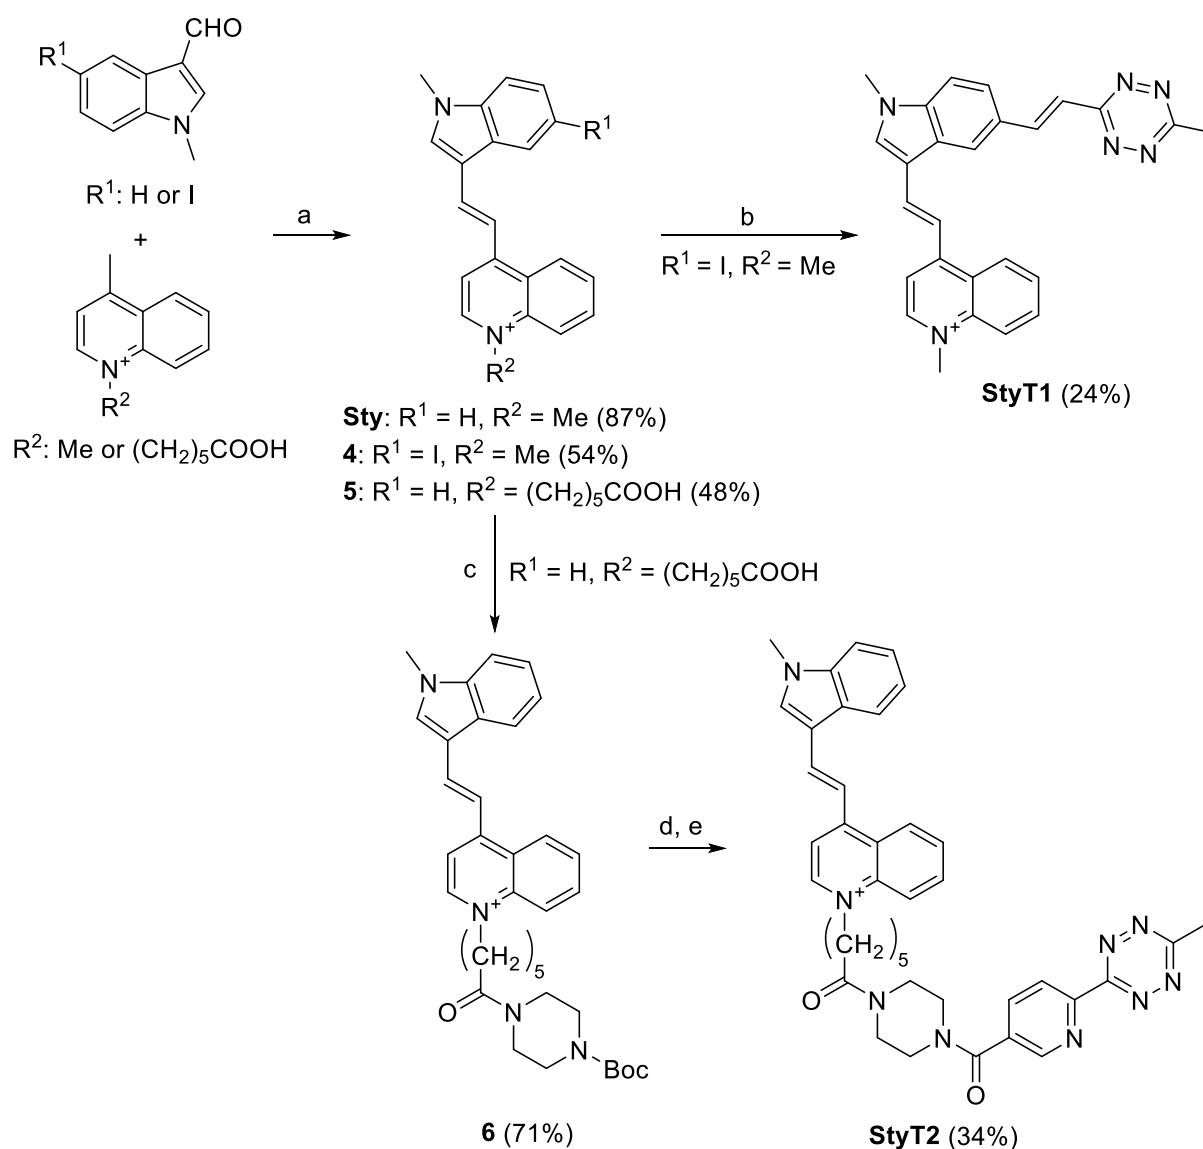

**Scheme S3.** a) piperidine, EtOH,  $\Delta$ , 16 h for **Sty** and **4**, 60 min for **5**, b) 2-(6-methyl-1,2,4,5-tetrazin-3-yl)ethyl methanesulfonate,  $\text{Pd}_2(\text{dba})_3$ , QPhos,  $\text{Cy}_2\text{NMe}$ , DMF, 100 °C MW, 60 min, c) Boc-piperazine, HATU,  $i\text{Pr}_2\text{NEt}$ ,  $\text{CH}_2\text{Cl}_2$ , rt, 30 min, d) TFA,  $\text{CH}_2\text{Cl}_2$ , rt, 20 min, e) 6-(6-methyl-1,2,4,5-tetrazin-3-yl)nicotinic acid, HOBt, HBTU,  $i\text{Pr}_2\text{NEt}$ , MeCN, rt, 60 min.

#### General procedure for the synthesis of **Sty** and **4**

A mixture of 1-methyl-1*H*-indole-3-carbaldehyde<sup>9</sup> (80 mg, 0.5 mmol, 1.0 equiv.) or 5-iodo-1-methyl-1*H*-indole-3-carbaldehyde<sup>10</sup> (143 mg, 0.5 mmol, 1.0 equiv.), *N*-methyl-4-methylquinolinium iodide<sup>4</sup> (200 mg, 0.7 mmol, 1.4 equiv.) and piperidine (128 mg, 148  $\mu\text{L}$ , 1.5 mmol, 3.0 equiv.) in 8 mL EtOH was refluxed for 16 h. After cooling down the precipitate was filtered and washed with EtOH. The product was used without further purification.

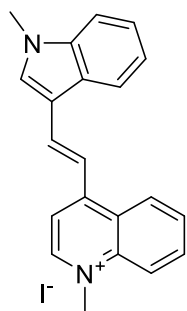

**1-Methyl-4-(2-(1-methyl-1*H*-indol-3-yl)vinyl)quinolin-1-ium iodide (Sty).**

Yield: 87% (186 mg, 0.44 mmol)

$^1\text{H}$  NMR (500 MHz, DMSO- $d_6$ )  $\delta$  9.10 (d,  $J$  = 6.7 Hz, 1H), 8.96 (d,  $J$  = 8.5 Hz, 1H), 8.54 (d,  $J$  = 15.6 Hz, 1H), 8.43 (d,  $J$  = 6.7 Hz, 1H), 8.35 (d,  $J$  = 8.8 Hz, 1H), 8.32 (s, 1H), 8.28 (d,  $J$  = 7.5 Hz, 1H), 8.22 (t,  $J$  = 7.6 Hz, 1H), 8.04 – 7.98 (m, 2H), 7.62 (d,  $J$  = 7.5 Hz, 1H), 7.39 – 7.32 (m, 2H), 4.45 (s, 3H), 3.94 (s, 3H).

$^{13}\text{C}$  NMR (75 MHz, DMSO- $d_6$ )  $\delta$  153.4, 146.6, 138.8, 137.9, 137.9, 136.1, 134.6, 128.5, 126.1, 125.9, 125.4, 123.2, 121.8, 120.4, 119.0, 113.6, 113.4, 112.6, 111.1, 43.9, 33.4.

HRMS:  $[\text{M}]^+$ : calcd for  $[\text{C}_{21}\text{H}_{19}\text{N}_2]^+$ :  $m/z$  = 299.1543, found: 299.1549.

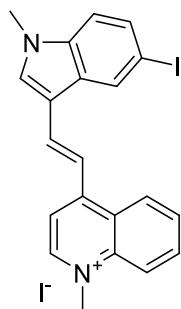

**4-(2-(5-Iodo-1-methyl-1*H*-indol-3-yl)vinyl)-1-methylquinolin-1-ium iodide (4).**

Yield: 54% (149 mg, 0.27 mmol)

$^1\text{H}$  NMR (500 MHz, acetone- $d_6$ )  $\delta$  9.13 (d,  $J$  = 6.6 Hz, 1H), 8.95 (d,  $J$  = 8.6 Hz, 1H), 8.52 (d,  $J$  = 15.7 Hz, 1H), 8.49 (d,  $J$  = 1.6 Hz, 1H), 8.48 – 8.43 (m, 2H), 8.27 (ddd,  $J$  = 8.6, 6.9, 1.3 Hz, 1H), 8.22 (s, 1H), 8.13 (d,  $J$  = 15.7 Hz, 1H), 8.07 – 8.02 (m, 1H), 7.65 (dd,  $J$  = 8.5, 1.6 Hz, 1H), 7.44 (d,  $J$  = 8.6 Hz, 1H), 4.67 (s, 3H), 3.99 (s, 3H).

$^{13}\text{C}$  NMR (75 MHz, acetone- $d_6$ )  $\delta$  155.5, 147.6, 140.2, 138.3, 137.9, 136.3, 135.8, 132.5, 129.7, 129.4, 127.1, 119.7, 115.0, 114.7, 114.1, 114.0, 111.9, 86.2, 72.8, 45.1, 34.0.

HRMS:  $[\text{M}]^+$ : calcd for  $[\text{C}_{21}\text{H}_{18}\text{IN}_2]^+$ :  $m/z$  = 425.0510, found: 425.0514.

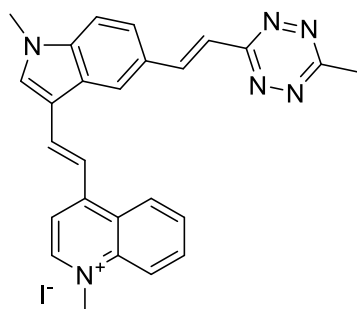

**1-Methyl-4-(2-(1-methyl-5-(2-(6-methyl-1,2,4,5-tetrazin-3-yl)vinyl)-1*H*-indol-3-yl)vinyl)quinolin-1-ium iodide (StyT1).**

In a dried microwave pressure tube with magnetic stir bar was dissolved **4** (55.2 mg, 0.1 mmol, 1.0 equiv.), 2-(6-methyl-1,2,4,5-tetrazin-3-yl)ethyl methanesulfonate<sup>8</sup> (65.6 mg, 0.3 mmol, 3.0 equiv.), *N,N*-dicyclohexylmethylamine (98 mg, 107  $\mu$ L, 0.5 mmol, 5 equiv.), tris(dibenzylideneacetone)dipalladium(0) (Pd<sub>2</sub>(dba)<sub>3</sub>, 9.2 mg, 0.01 mmol, 0.1 equiv.) and 1,2,3,4,5-pentaphenyl-1'-(di-*tert*-butylphosphino)ferrocene (QPhos, 7.1 mg, 0.01 mmol, 0.1 equiv.) in 5 mL dimethylformamide. The mixture was heated in a microwave reactor at 100 °C for 60 min. The solvent was evaporated in vacuo and the crude product was purified by flash chromatography on alumina using CH<sub>2</sub>Cl<sub>2</sub>/MeOH as eluent. Hexane was added to the fractions containing the product, the precipitate was filtered and washed with hexane.

Yield: 24% (13 mg, 0.024 mmol)

<sup>1</sup>H NMR (500 MHz, DMSO-*d*<sub>6</sub>)  $\delta$  9.17 (d, *J* = 6.6 Hz, 1H), 9.03 (d, *J* = 8.5 Hz, 1H), 8.74 (s, 1H), 8.58 (d, *J* = 15.7 Hz, 1H), 8.52 (d, *J* = 16.3 Hz, 1H), 8.46 (d, *J* = 6.7 Hz, 1H), 8.43 – 8.35 (m, 2H), 8.24 (t, *J* = 7.9 Hz, 1H), 8.13 (d, *J* = 15.7 Hz, 1H), 8.05 (t, *J* = 7.7 Hz, 1H), 7.95 (d, *J* = 8.6 Hz, 1H), 7.74 – 7.68 (m, 2H), 4.48 (s, 3H), 3.98 (s, 3H), 2.97 (s, 3H).

<sup>13</sup>C NMR (126 MHz, DMSO-*d*<sub>6</sub>)  $\delta$  165.8, 164.4, 153.6, 146.7, 141.1, 138.8, 138.6, 136.9, 136.2, 134.6, 128.8, 128.6, 126.4, 126.9, 125.5, 122.6, 121.5, 119.0, 118.8, 114.2, 113.8, 113.8, 111.7, 44.0, 33.5, 20.8.

HRMS: [M]<sup>+</sup>: calcd for [C<sub>26</sub>H<sub>23</sub>N<sub>6</sub>]<sup>+</sup>: *m/z* = 419.1979, found: 419.1979.

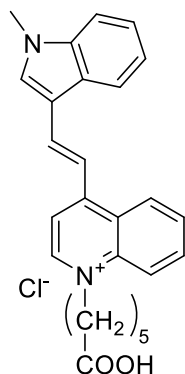

**1-(5-Carboxypentyl)-4-(2-(1-methyl-1H-indol-3-yl)vinyl)quinolin-1-ium chloride (5).**

A mixture of 1-methyl-1H-indole-3-carbaldehyde<sup>9</sup> (80 mg, 0.5 mmol, 1.0 equiv.) *N*-(5-carboxypentyl)-4-methylquinolin-1-ium bromide<sup>11</sup> (237 mg, 0.7 mmol, 1.4 equiv.) and piperidine (128 mg, 148  $\mu$ L, 1.5 mmol, 3.0 equiv.) in 8 mL EtOH was refluxed for 1 h. After cooling down to rt, the reaction mixture was diluted with water and acidified to pH 5 using 2M aqueous HCl. The product was collected by filtration, washed with water and dried. The product was used without further purification.

Yield: 48% (105 mg, 0.24 mmol)

<sup>1</sup>H NMR (500 MHz, CD<sub>3</sub>OD)  $\delta$  8.72 (d, *J* = 6.4 Hz, 1H), 8.60 (d, *J* = 8.5 Hz, 1H), 8.23 – 8.14 (m, 2H), 8.12 – 8.03 (m, 2H), 7.96 (d, *J* = 7.7 Hz, 1H), 7.89 – 7.82 (m, 2H), 7.72 (d, *J* = 15.5 Hz, 1H), 7.41 (d, *J* = 8.0 Hz, 1H), 7.32 (t, *J* = 7.4 Hz, 1H), 7.27 (t, *J* = 7.4 Hz, 1H), 4.66 (t, *J* = 7.5 Hz, 2H), 3.81 (s, 3H), 2.27 (t, *J* = 7.1 Hz, 2H), 1.97 (p, *J* = 7.6 Hz, 2H), 1.68 (p, *J* = 7.3 Hz, 2H), 1.47 (p, *J* = 7.7 Hz, 2H).

<sup>13</sup>C NMR (126 MHz, CD<sub>3</sub>OD)  $\delta$  179.4, 162.3, 155.8, 146.3, 139.9, 139.7, 139.4, 137.8, 135.9, 129.7, 127.4, 127.2, 124.7, 123.3, 121.4, 119.4, 115.6, 114.3, 113.7, 111.7, 57.4, 36.4, 33.7, 30.3, 27.1, 26.0.

HRMS: [M]<sup>+</sup>: calcd for [C<sub>26</sub>H<sub>27</sub>N<sub>2</sub>O<sub>2</sub>]<sup>+</sup>: *m/z* = 399.2068, found: 399.2065.

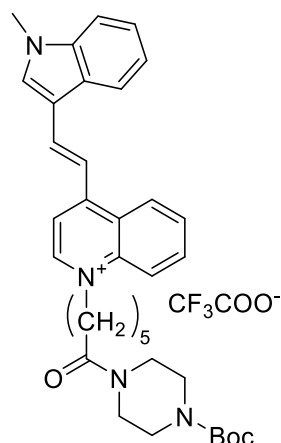

**1-(6-(4-(*Tert*-butoxycarbonyl)piperazin-1-yl)-6-oxohexyl)-4-(2-(1-methyl-1*H*-indol-3-yl)vinyl)quinolin-1-ium trifluoroacetate (6).**

A solution of **5** (100 mg, 0.23 mmol, 1.0 equiv.), 1-Boc-piperazine (42.8 mg, 0.23 mmol, 1.0 equiv.), HATU (104.9 mg, 0.276 mmol, 1.2 equiv.) and *i*Pr<sub>2</sub>NEt (31.9 mg, 43  $\mu$ L, 0.345 mmol, 1.5 equiv.) in 5 mL CH<sub>2</sub>Cl<sub>2</sub> was stirred at rt for 30 min. The solvent was removed and the residue was purified by flash column chromatography on C18 silica using water/MeCN containing 0.1% TFA as eluent.

Yield: 71% (111 mg; 0.163 mmol)

<sup>1</sup>H NMR (500 MHz, CD<sub>3</sub>OD)  $\delta$  8.86 (d, *J* = 6.8 Hz, 1H), 8.79 (d, *J* = 8.5 Hz, 1H), 8.38 (d, *J* = 15.5 Hz, 1H), 8.32 (d, *J* = 8.9 Hz, 1H), 8.21 (d, *J* = 6.7 Hz, 1H), 8.19 – 8.11 (m, 2H), 8.00 – 7.92 (m, 3H), 7.52 (dd, *J* = 6.9, 1.6 Hz, 1H), 7.41 – 7.33 (m, 2H), 4.83 (t, *J* = 7.5 Hz, 2H), 3.92 (s, 3H), 3.57 – 3.48 (m, 4H), 3.46 – 3.37 (m, 4H), 2.44 (t, *J* = 7.2 Hz, 2H), 2.06 (p, *J* = 7.8 Hz, 2H), 1.69 (p, *J* = 7.3 Hz, 3H), 1.51 (p, *J* = 7.9 Hz, 2H), 1.46 (s, 9H).

<sup>13</sup>C NMR (126 MHz, CD<sub>3</sub>OD)  $\delta$  172.4, 160.7 (q, *J* = 35 Hz), 154.8, 154.6, 145.0, 138.5, 138.4, 138.1, 136.5, 134.5, 128.3, 126.1, 125.9, 125.8, 123.3, 122.0, 120.0, 118.1, 114.3, 114.2 (q, *J* = 253 Hz), 112.9, 112.3, 110.3, 80.3, 56.0, 45.0, 41.2, 32.3, 32.1, 29.0, 27.2, 25.7, 24.2.

HRMS: [M]<sup>+</sup>: calcd for [C<sub>35</sub>H<sub>43</sub>N<sub>4</sub>O<sub>3</sub>]<sup>+</sup>: *m/z* = 567.3330, found: 567.3337.

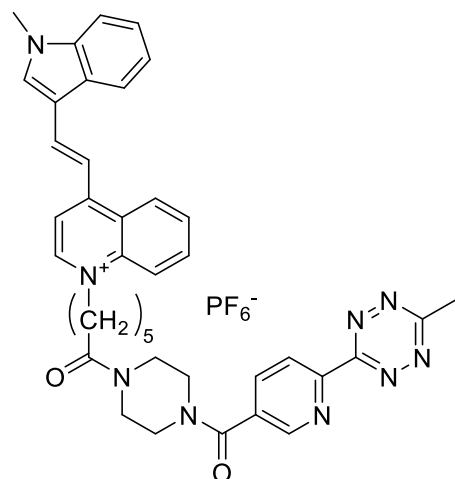

**1-(6-(4-(6-(6-Methyl-1,2,4,5-tetrazin-3-yl)nicotinoyl)piperazin-1-yl)-6-oxohexyl)-4-(2-(1-methyl-1*H*-indol-3-yl)vinyl)quinolin-1-ium hexafluorophosphate(V) (StyT2).**

To a solution of **6** (100 mg, 0.15 mmol, 1.0 equiv.) in 2 mL CH<sub>2</sub>Cl<sub>2</sub> was added 0.5 mL TFA, and it was stirred at rt for 20 min. The volatiles were removed and the residue was dissolved in 5 mL MeCN. 6-(6-Methyl-1,2,4,5-tetrazin-3-yl)nicotinic acid<sup>12</sup> (45.7 mg, 0.21 mmol, 1.4 equiv.), HOBt hydrate (24.0 mg, 0.15 mmol, 1.0 equiv.), HBTU (56.8 mg, 0.15

mmol, 1.0 equiv.) and  $i\text{Pr}_2\text{NEt}$  (58 mg, 78  $\mu\text{L}$ , 0.45 mmol, 3.0 equiv) were added and the mixture was stirred at rt for 1 h. The crude product was purified by flash column chromatography on C18 silica using water/MeCN containing 0.1% TFA as eluent. Ammonium hexafluorophosphate was added to the product containing fraction and MeCN was removed. The precipitated product was collected by filtration, washed with water and dried.

Yield: 34% (41 mg, 0.051 mmol)

$^1\text{H}$  NMR (500 MHz, acetone- $d_6$ )  $\delta$  9.09 (d,  $J$  = 6.8 Hz, 1H), 8.93 (d,  $J$  = 8.4 Hz, 1H), 8.89 (d,  $J$  = 2.1 Hz, 1H), 8.58 (d,  $J$  = 8.0 Hz, 1H), 8.54 – 8.45 (m, 2H), 8.37 (d,  $J$  = 6.7 Hz, 1H), 8.26 – 8.17 (m, 2H), 8.16 – 8.11 (m, 2H), 8.07 (d,  $J$  = 15.6 Hz, 1H), 8.00 (t,  $J$  = 7.8 Hz, 1H), 7.57 (d,  $J$  = 7.9 Hz, 1H), 7.38 (t,  $J$  = 7.1 Hz, 1H), 7.33 (t,  $J$  = 7.5 Hz, 1H), 5.02 (t,  $J$  = 7.6 Hz, 2H), 3.98 (s, 3H), 3.80 – 3.53 (m, 8H), 3.09 (s, 3H), 2.50 – 2.39 (m, 2H), 2.17 (p,  $J$  = 7.5 Hz, 2H), 1.72 (p,  $J$  = 7.4 Hz, 2H), 1.58 (p,  $J$  = 7.7 Hz, 2H).

$^{13}\text{C}$  NMR (126 MHz, acetone- $d_6$ )  $\delta$  171.7, 169.0, 167.6, 164.4, 155.7, 152.5, 149.7, 146.7, 139.6, 139.5, 139.3, 137.6, 137.2, 136.8, 135.8, 134.9, 129.6, 127.3, 127.0, 124.4, 124.3, 123.0, 121.4, 119.6, 115.2, 114.5, 113.7, 111.8, 57.4, 33.8, 33.0, 30.6, 30.2, 26.8, 25.0, 21.4.

HRMS:  $[M]^+$ : calcd for  $[\text{C}_{39}\text{H}_{40}\text{N}_9\text{O}_2]^+$ :  $m/z$  = 666.3300, found: 666.3307.

## 2. Spectroscopic characterization

Photophysical measurements were performed on a JASCO FP 8300 spectrofluorometer and a JASCO v750 spectrophotometer. A stock solution in DMSO was prepared from the solid dyes (1 mM). Calf thymus DNA (Merck, 2618) was dissolved in TRIS (pH = 8.5) to give a stock solution of 2.0 mg/mL, which was diluted with PBS (pH = 7.4) to a concentration of 0.4 mg/mL. All spectroscopic measurements were conducted in PBS (pH=7.4) or 0.4 mg/mL DNA solution.

All of the dyes (1 mM) were reacted with (1*R*,8*S*,9*S*)-Bicyclo6.1.0non-4-yn-9-ylmethanol (BCN) in DMSO at room temperature (Scheme S4). The completion of the reaction was verified by HPLC-MS.

Absorbance and emission spectra were recorded using 0.5–2.5  $\mu\text{M}$  concentration of the compounds in quartz cuvettes with 1 cm optical path length. Quantum yields were determined using Coumarin-153 ( $\Phi_{\text{EtOH}} = 0.55$ )<sup>13</sup> as standard for **Cy1**, **Cy1A**, **BO**, **BOA**, **TO\*** and **TOA\***, and Rhodamine-6g ( $\Phi_{\text{EtOH}} = 0.95$ )<sup>14</sup> as standard for **TO**, **TOA**, **TOT**, **Sty**, **StyT1** and **StyT2**.

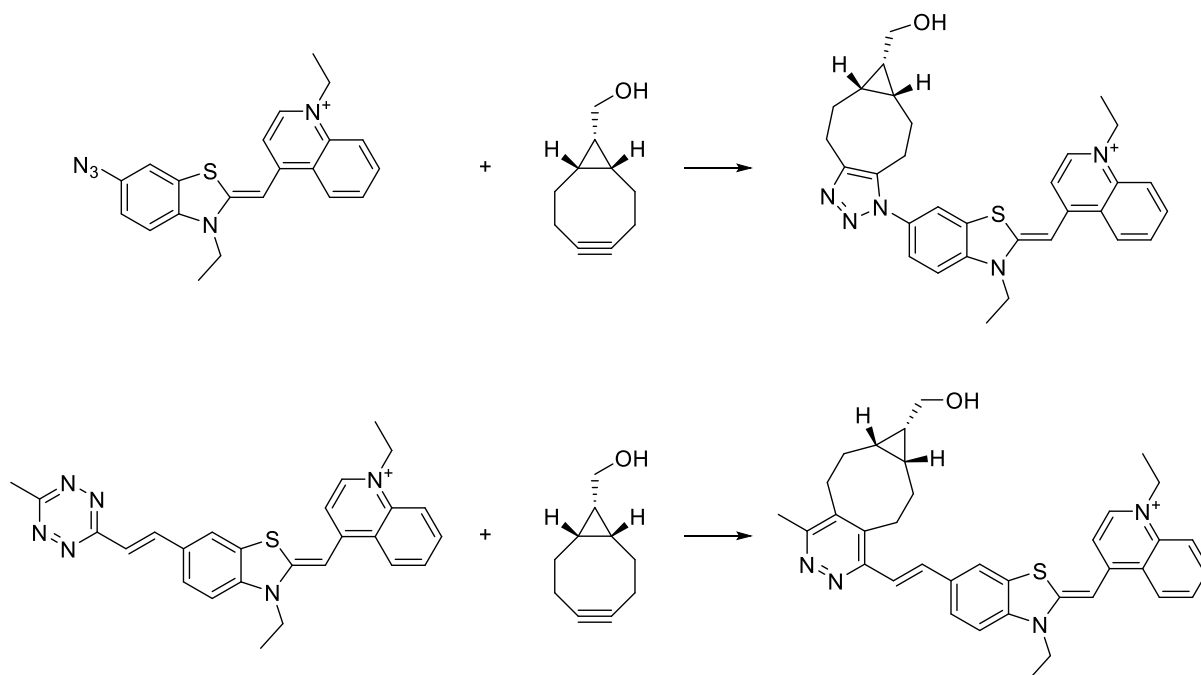

**Scheme S4.** Representative reactions of azides and tetrazines with BCN using **TOA** and **TOT** as examples.

**Table S1.** Absorption maxima and molar extinction coefficients at the absorption maxima of the dyes in the presence or absence of BCN and DNA.

|              | $\lambda_{\text{abs,PBS}}$ (nm) | $\epsilon_{\text{PBS}}$ | +BCN<br>$\lambda_{\text{abs,PBS}}$ (nm) | +BCN<br>$\epsilon_{\text{PBS}}$ | $\lambda_{\text{abs,DNA}}$ (nm) | $\epsilon_{\text{DNA}}$ | +BCN<br>$\lambda_{\text{abs,DNA}}$ (nm) | +BCN<br>$\epsilon_{\text{DNA}}$ |
|--------------|---------------------------------|-------------------------|-----------------------------------------|---------------------------------|---------------------------------|-------------------------|-----------------------------------------|---------------------------------|
| <b>Cy1</b>   | 422                             | 64600                   | —                                       | —                               | 428                             | 69800                   | —                                       | —                               |
| <b>Cy1A</b>  | 432                             | 77200                   | 425                                     | 79800                           | 439                             | 96000                   | 430                                     | 87600                           |
| <b>BO</b>    | 455                             | 61700                   | —                                       | —                               | 455                             | 68500                   | —                                       | —                               |
| <b>BOA</b>   | 454                             | 73900                   | 443                                     | 80200                           | 465                             | 79100                   | 445                                     | 95300                           |
| <b>TO*</b>   | 483                             | 45800                   | —                                       | —                               | 492                             | 53600                   | —                                       | —                               |
| <b>TOA*</b>  | 490                             | 51400                   | 481                                     | 52800                           | 496                             | 77400                   | 484                                     | 67100                           |
| <b>TO</b>    | 502                             | 56900                   | —                                       | —                               | 511                             | 76300                   | —                                       | —                               |
| <b>TOA</b>   | 511                             | 47600                   | 499                                     | 60200                           | 519                             | 84300                   | 504                                     | 80000                           |
| <b>TOT</b>   | 500                             | 19200                   | 498                                     | 23500                           | 529                             | 52500                   | 526                                     | 50000                           |
| <b>Sty</b>   | 483                             | 27100                   | —                                       | —                               | 522                             | 36700                   | —                                       | —                               |
| <b>StyT1</b> | 491                             | 16100                   | 490                                     | 9300                            | 513                             | 13100                   | 517                                     | 15200                           |
| <b>StyT2</b> | 500                             | 7100                    | 500                                     | 7200                            | 518                             | 9400                    | 515                                     | 9100                            |

**Table S2.** Emission maxima and fluorescence quantum yields of the dyes in the presence or absence of BCN and DNA.

|              | $\lambda_{\text{em,PBS}}$ (nm) | $\Phi_{\text{PBS}}$ | +BCN<br>$\lambda_{\text{em,PBS}}$ (nm) | +BCN<br>$\Phi_{\text{PBS}}$ | $\lambda_{\text{em,DNA}}$ (nm) | $\Phi_{\text{DNA}}$ | +BCN<br>$\lambda_{\text{em,DNA}}$ (nm) | +BCN<br>$\Phi_{\text{DNA}}$ |
|--------------|--------------------------------|---------------------|----------------------------------------|-----------------------------|--------------------------------|---------------------|----------------------------------------|-----------------------------|
| <b>Cy1</b>   | 475                            | 0.0028              | —                                      | —                           | 463                            | 0.41                | —                                      | —                           |
| <b>Cy1A</b>  | 478                            | 0.0014              | 478                                    | 0.0028                      | 487                            | 0.047               | 457                                    | 0.19                        |
| <b>BO</b>    | 474                            | 0.00053             | —                                      | —                           | 480                            | 0.24                | —                                      | —                           |
| <b>BOA</b>   | N.D.                           | N.D.                | 469                                    | 0.0010                      | 489                            | 0.017               | 471                                    | 0.094                       |
| <b>TO*</b>   | 547                            | 0.00013             | —                                      | —                           | 544                            | 0.050               | —                                      | —                           |
| <b>TOA*</b>  | 570                            | 0.00021             | 557                                    | 0.00046                     | 555                            | 0.030               | 533                                    | 0.16                        |
| <b>TO</b>    | 539                            | 0.00029             | —                                      | —                           | 530                            | 0.30                | —                                      | —                           |
| <b>TOA</b>   | 565                            | 0.00033             | 540                                    | 0.00061                     | 542                            | 0.083               | 528                                    | 0.53                        |
| <b>TOT</b>   | N.D.                           | N.D.                | 601                                    | 0.0016                      | 543                            | 0.014               | 548                                    | 0.24                        |
| <b>Sty</b>   | 595                            | 0.0031              | —                                      | —                           | 588                            | 0.19                | —                                      | —                           |
| <b>StyT1</b> | 602                            | 0.00093             | 601                                    | 0.0024                      | 590                            | 0.014               | 599                                    | 0.072                       |
| <b>StyT2</b> | 598                            | 0.014               | 596                                    | 0.013                       | 583                            | 0.15                | 584                                    | 0.15                        |

### 3. Conversion of TOA and TOT in the cycloaddition reactions

10 mM stock solutions of **TOA**, **TOT** and BCN were prepared in DMSO. 5  $\mu\text{L}$  of the dye solution was diluted with 100  $\mu\text{L}$  MeCN and 890  $\mu\text{L}$  0.02M HEPES, then 5  $\mu\text{L}$  of the BCN solution was added. The reaction was followed using LCMS.

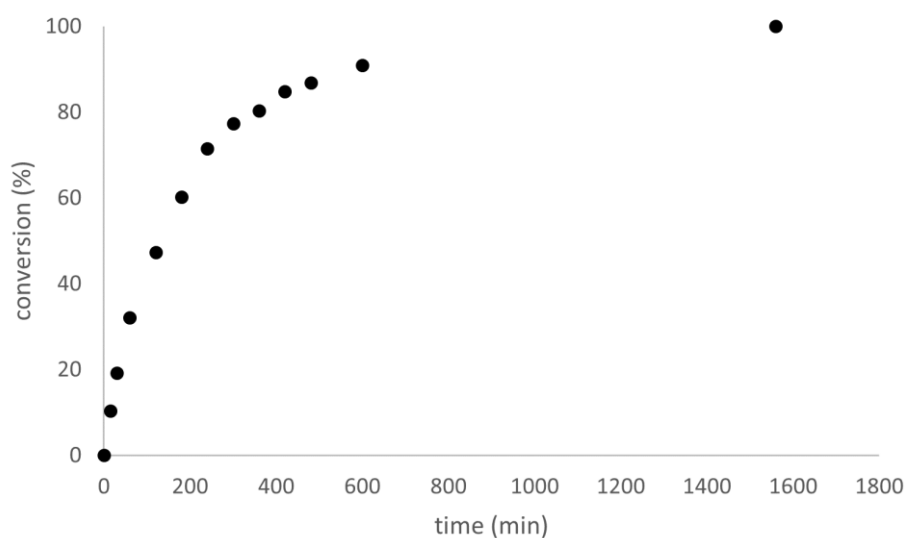

**Figure S1.** Conversion of the cycloaddition reaction of **TOA** and BCN as a function of time.

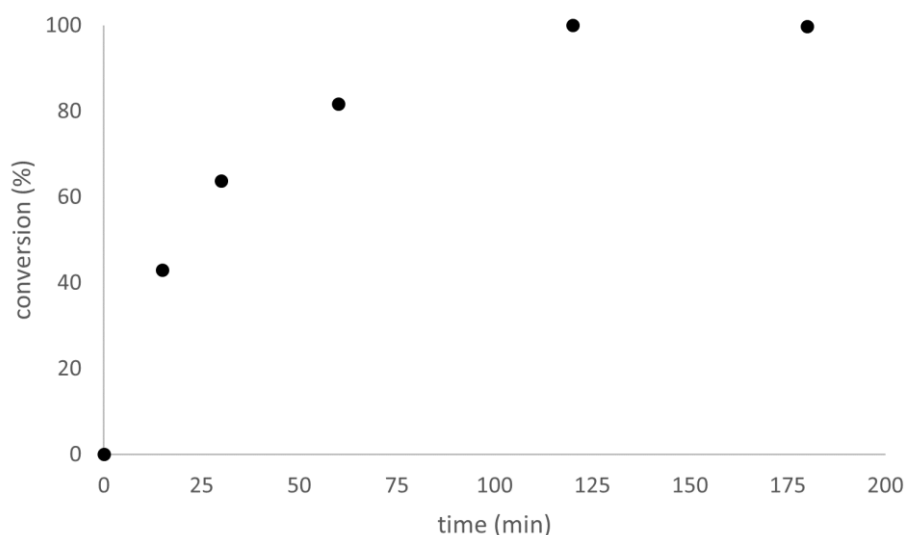

**Figure S2.** Conversion of the cycloaddition reaction of **TOT** and BCN as a function of time.

## 4. Cellular studies

### 4.1. Cell culture

HEK293T (ATCC; CRL-3216, Manassas, VA, USA) were maintained in Dulbecco's modified Eagle's medium (DMEM, Gibco 41965-039) supplemented with 10% FBS (Gibco 10500-064), 1% penicillin-streptomycin (Gibco 15140-122), 1% Glutamax (Gibco 35050-061) and 1% sodium pyruvate (Life Technologies, Gibco 11360-070). The cells were cultured at 37°C in a 5% CO<sub>2</sub> atmosphere and passaged - using trypsin (Gibco 25300-054) every 3-4 days until 20 passages.

### 4.2. Effect of dyes on cell viability

An MTT viability test was carried out to assess the toxicity of **TO** and **TOT** dyes on HEK293T cells. Cells were transferred into a 48-well plate (Thermo Fisher Scientific,

130187) (30,000 cells/well) and incubated for 48 h at 37 °C in a 5% CO<sub>2</sub> atmosphere. Cells were then treated with compounds **TO** and **TOT** in the concentration range of 1 μM-10 μM for 24 h incubation period at 37 °C in 5% CO<sub>2</sub> atmosphere. After the incubation period, supernatants were replaced with 0.5 mg/ml MTT (3-(4,5-dimethylthiazol-2-yl)-2,5-diphenyltetrazolium bromide) solution (in complete DMEM) and incubated for 120 min at 37 °C in the dark. The insoluble formazan crystals were dissolved in 250 μL DMSO. Absorbance was detected at 540 nm using a Biotek Synergy 2 Cytation 3 imaging plate reader with Gen5 software version 3.08 (Biotek Winooski, VT, USA). Viability was expressed as percentage (n=3) of the readings of untreated control cells.

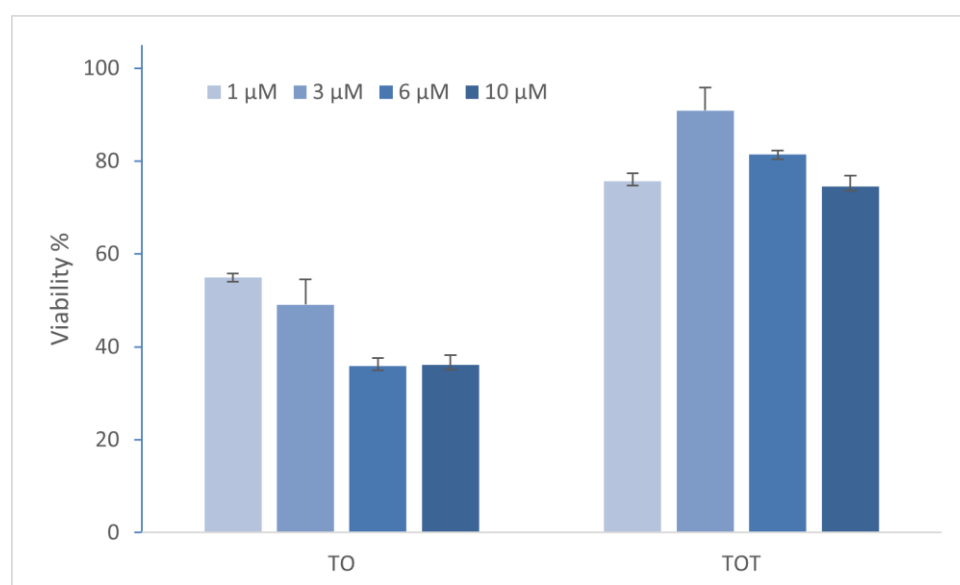

**Figure S3.** Viability of HEK293T cells upon treatment of **TO** and **TOT** in the percentage of untreated controls (n=3).

#### 4.3. Live-cell labeling

HEK293T (40,000 cell/well) cells were transferred into μ-Slide 8 well plates (Ibidi 80827) and were incubated for 40 h at 37°C in a 5% CO<sub>2</sub> atmosphere. Ibidi plates were pretreated with 0.01 mg/mL Poly-L-lysine (Sigma P5899) for 4 hours at room temperature and washed afterwards.

Overexpression of DNA binding protein histone H2B and LaminA as well as Vimentin and TOMM20 in fusion with HaloTag self-labeling enzyme was achieved by transfection with 0.25 μg plasmids using Lipofectamine3000 (ThermoScientific L3000-008) transfection agent in OptiMEM medium (Gibco 31985-062) for four hours according to the manufacturer's protocol. Subsequently, the supernatant was replaced with complete DMEM medium for overnight. The day after transfection, the bioorthogonally reactive chemical reporter BCN in HaloTag substrate (HaloBCN) was administered to the cells before the fluorescent labeling step in the concentration of 3 μM in complete DMEM for 60 min at 37°C in the dark. After removing HaloBCN **TOT** or **SiR-tet**<sup>15</sup> (Figure S4) was added to the cells -in 6 μM or 3 μM, respectively- in media for 90 min at 37°C in the dark. Afterwards, a two-hour washing step – with complete culturing media – was interpolated followed by fixation (4% PFA for 10 min at 25°C) and quick washing – twice – with PBS prior to imaging.

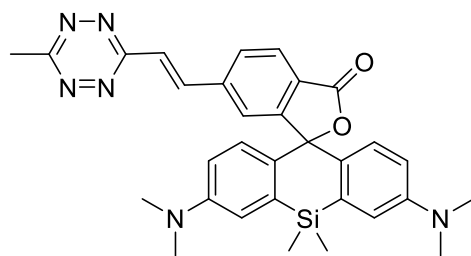

**Figure S4.** Structure of SiR-tet.

#### 4.4. Construction of HaloTag plasmids

The construction of plasmids (Lamin-HaloTag, H2B-HaloTag, Vimentin-HaloTag and TOMM20-HaloTag) applied here was reported previously in Szatmari et al.<sup>16</sup>

#### 4.5. Fluorescent confocal microscopy

Confocal images were acquired on a Leica TCS SP8 microscope using the 488 nm laser for excitation. The images were taken using a Leica HC PL APO 100x/1.40 oil immersion objective along with Leica HyD detector. Images were analyzed using Leica Application Suite X and ImageJ software (NIH).

### 5. NMR Spectra

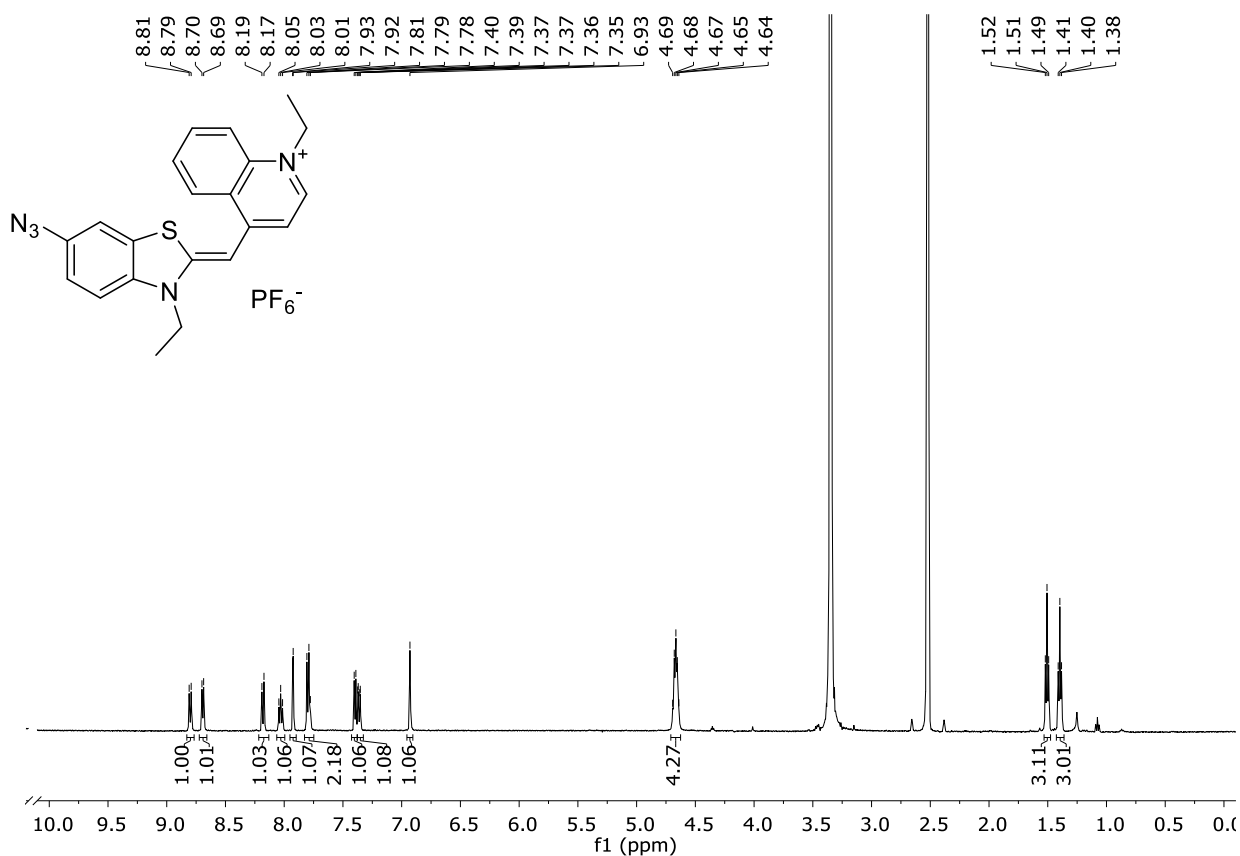

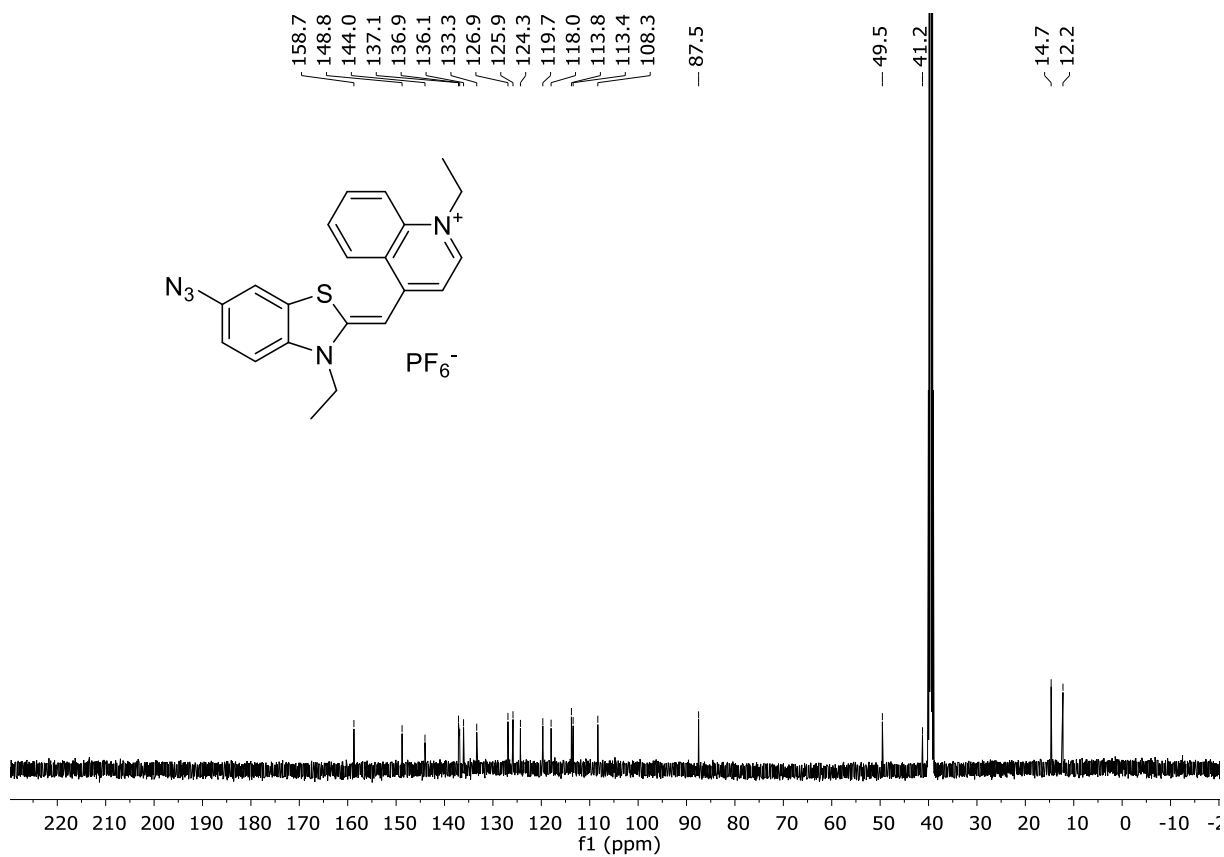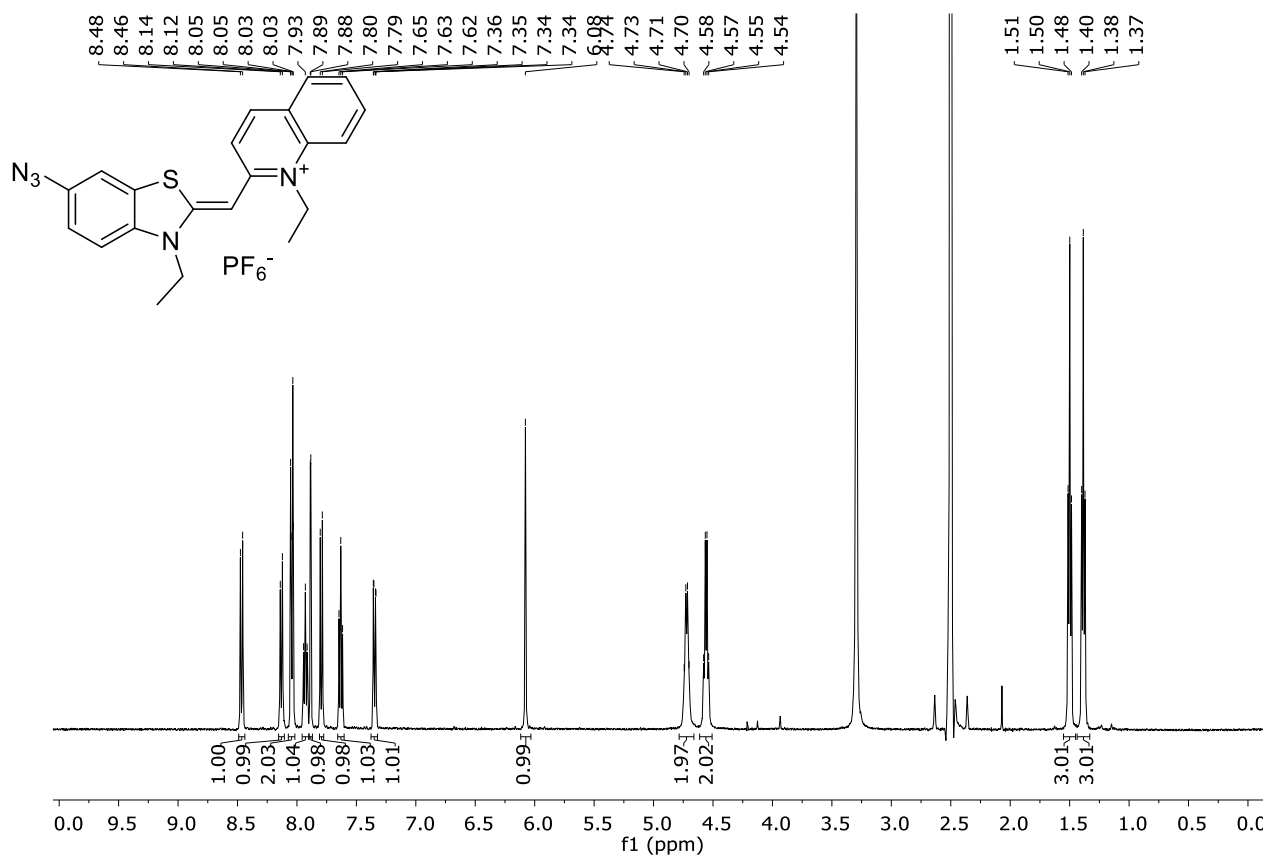

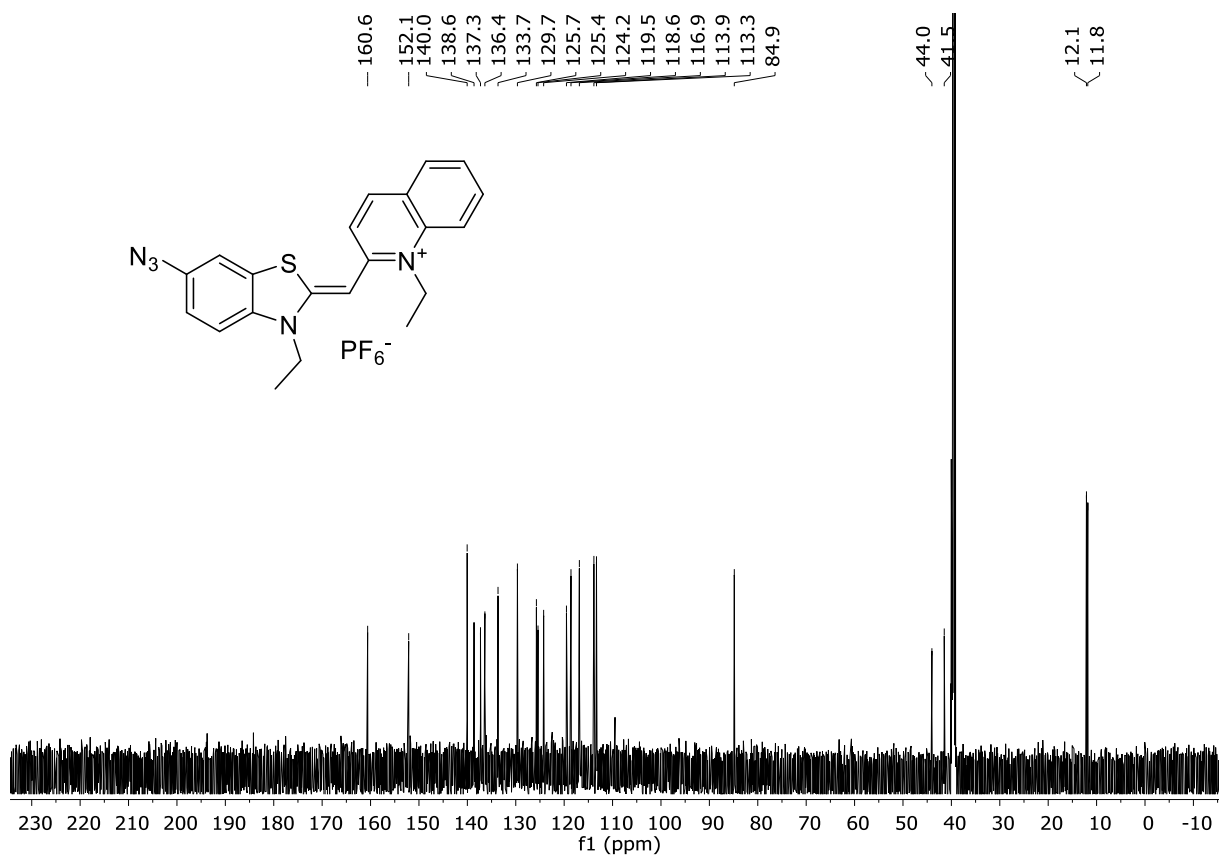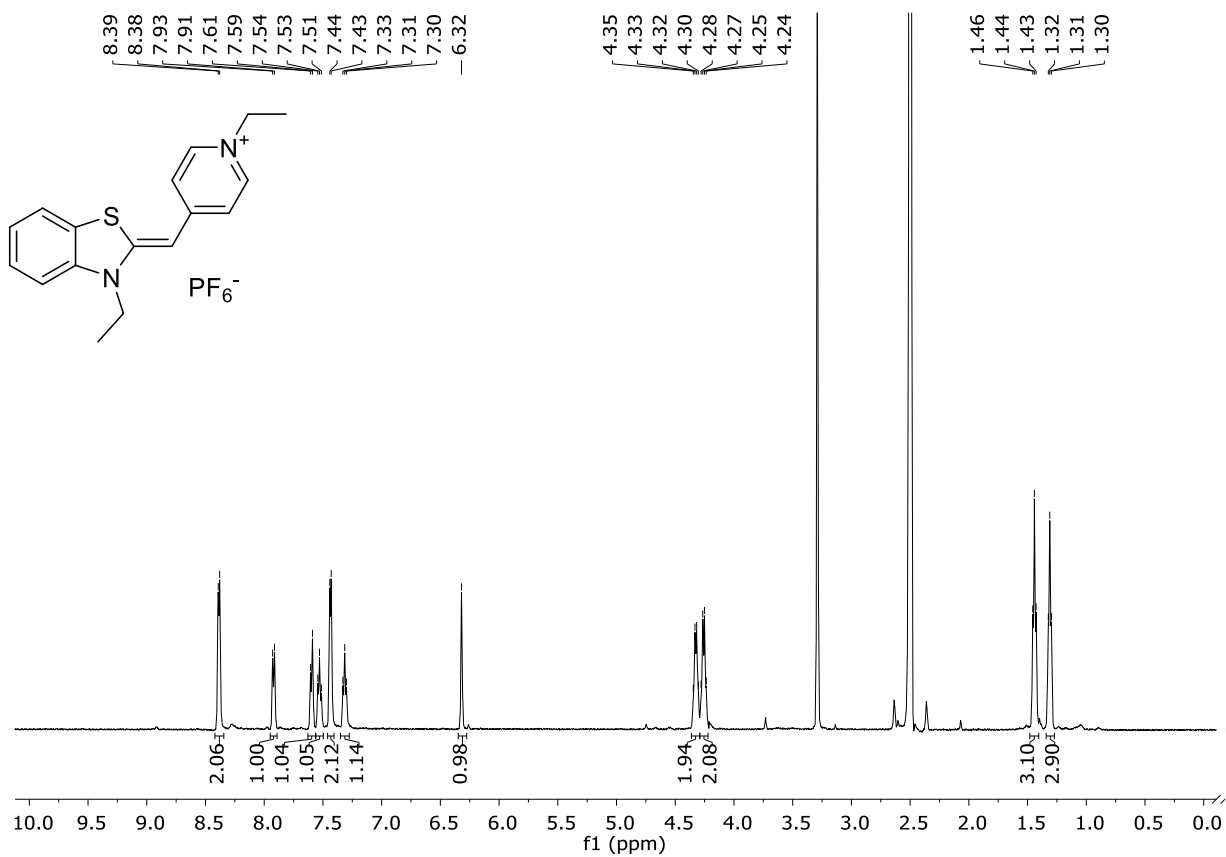

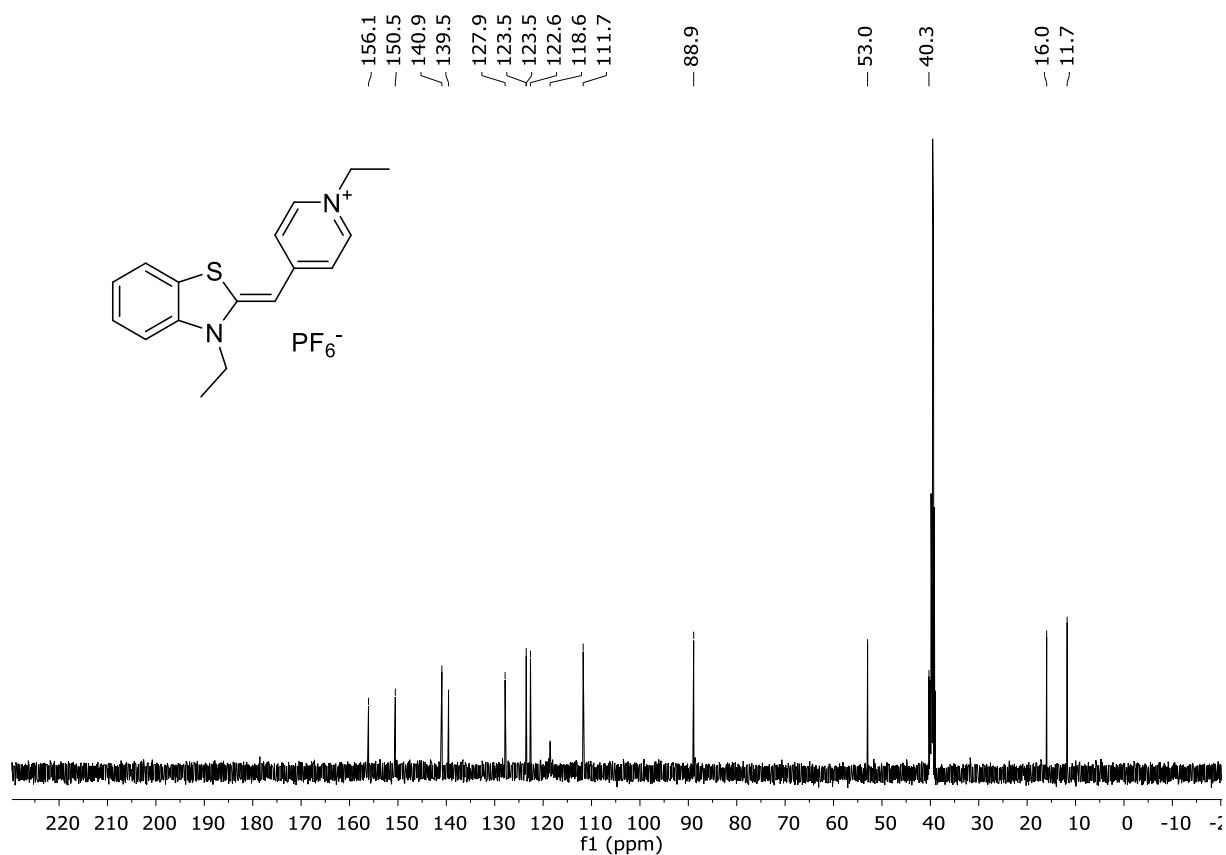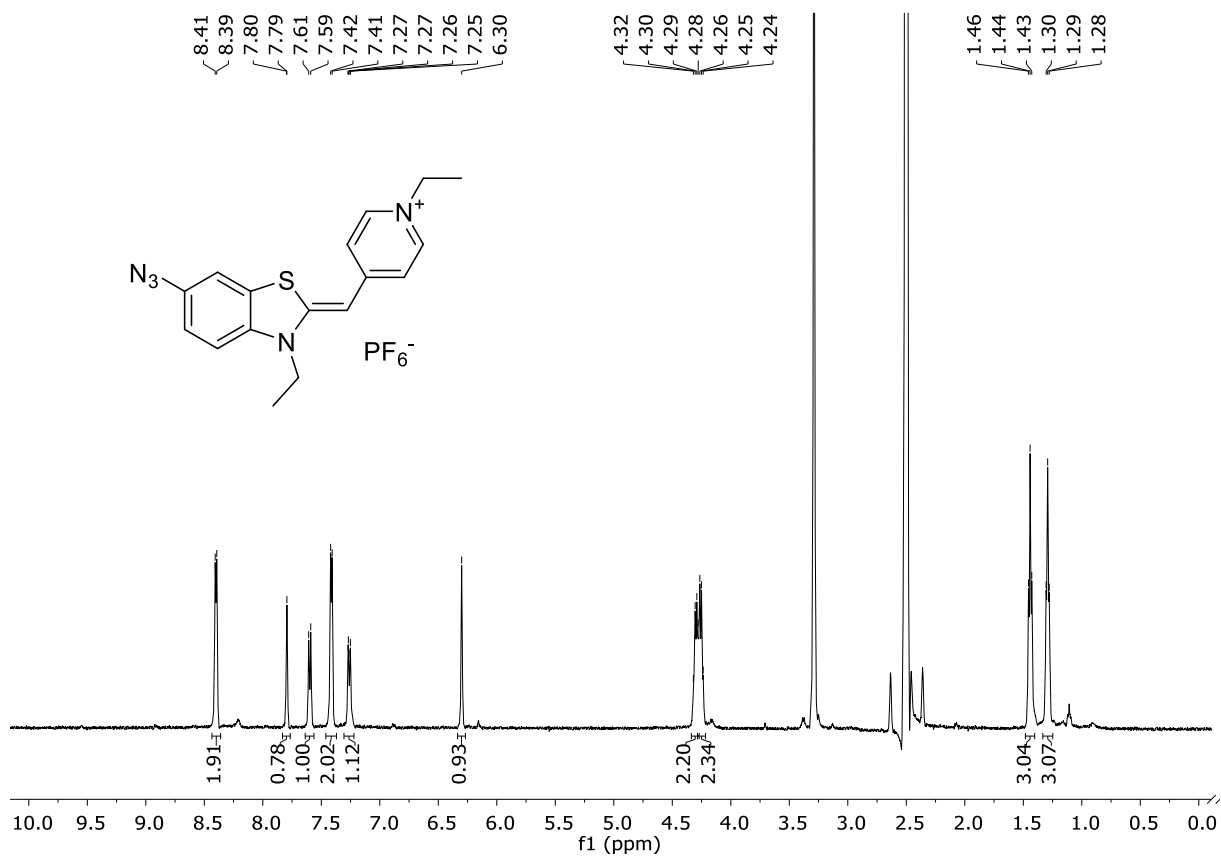

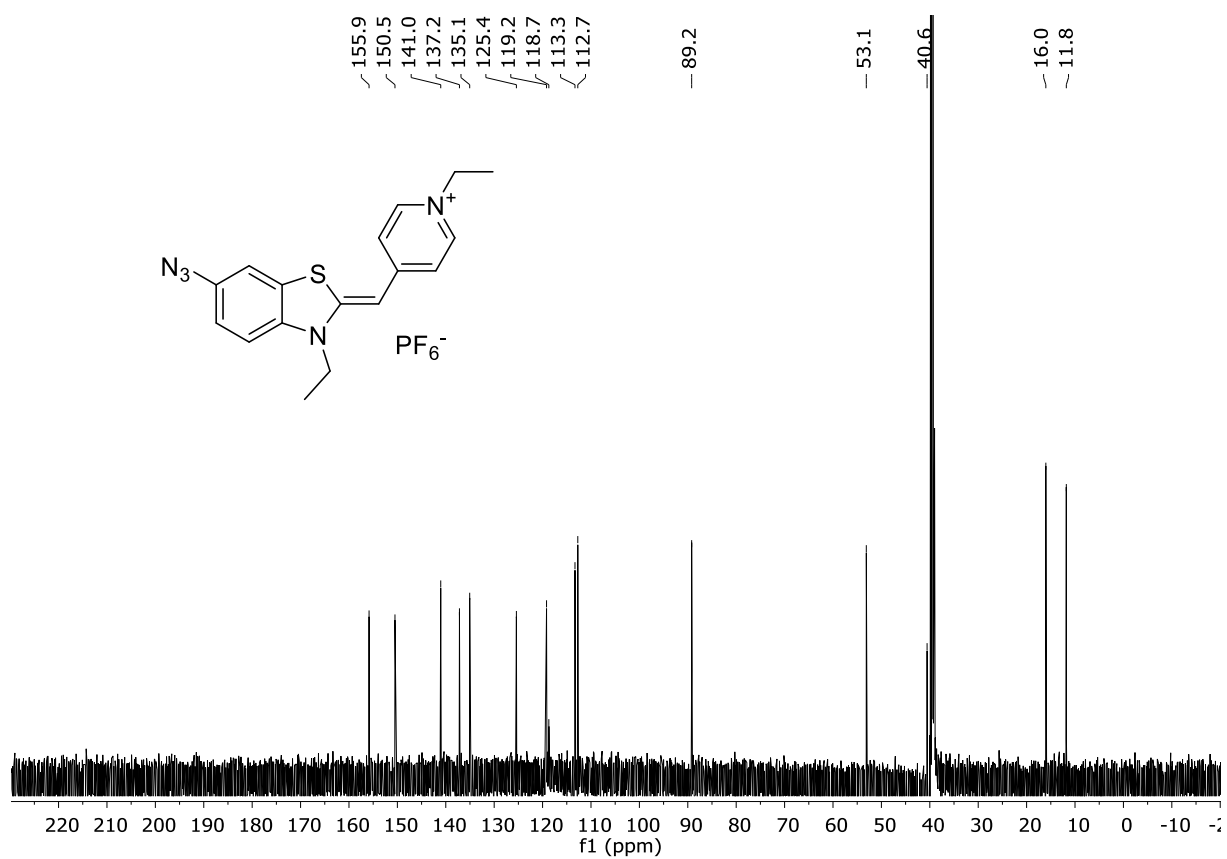

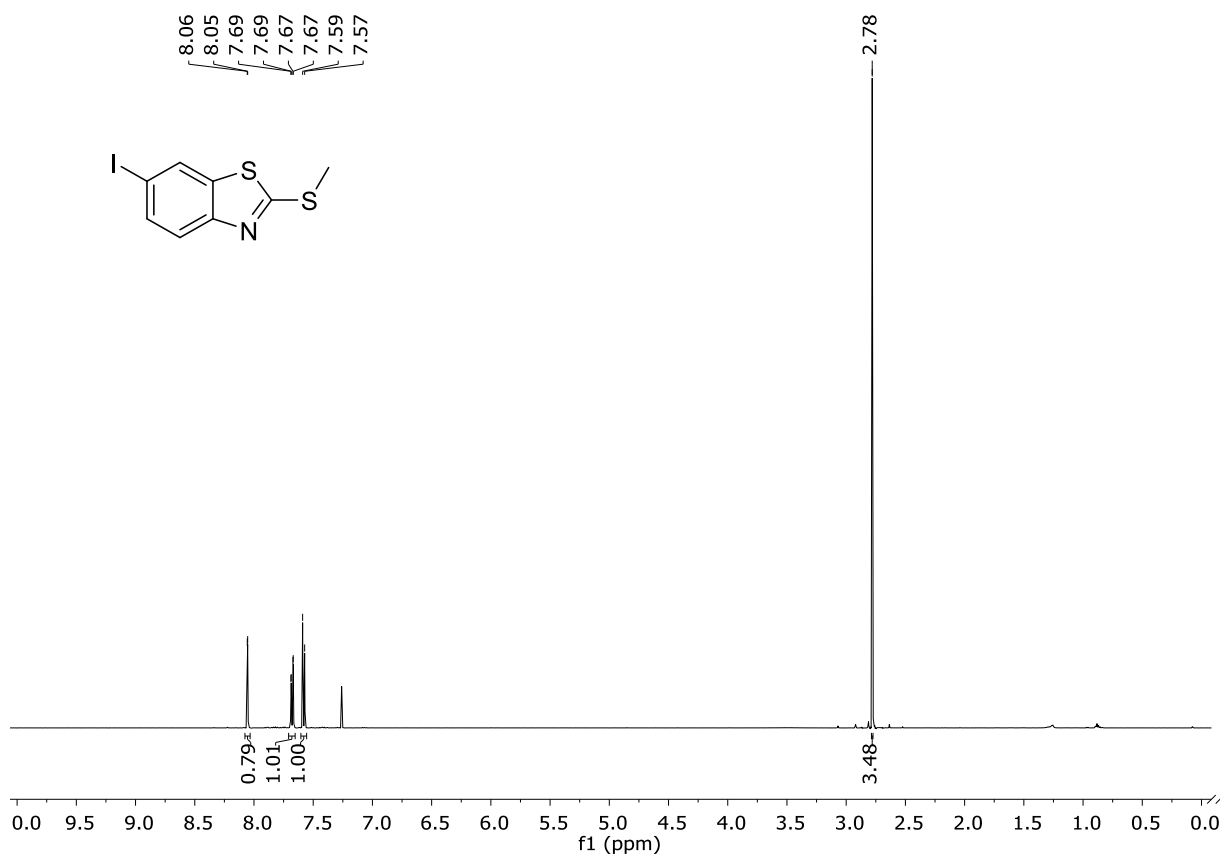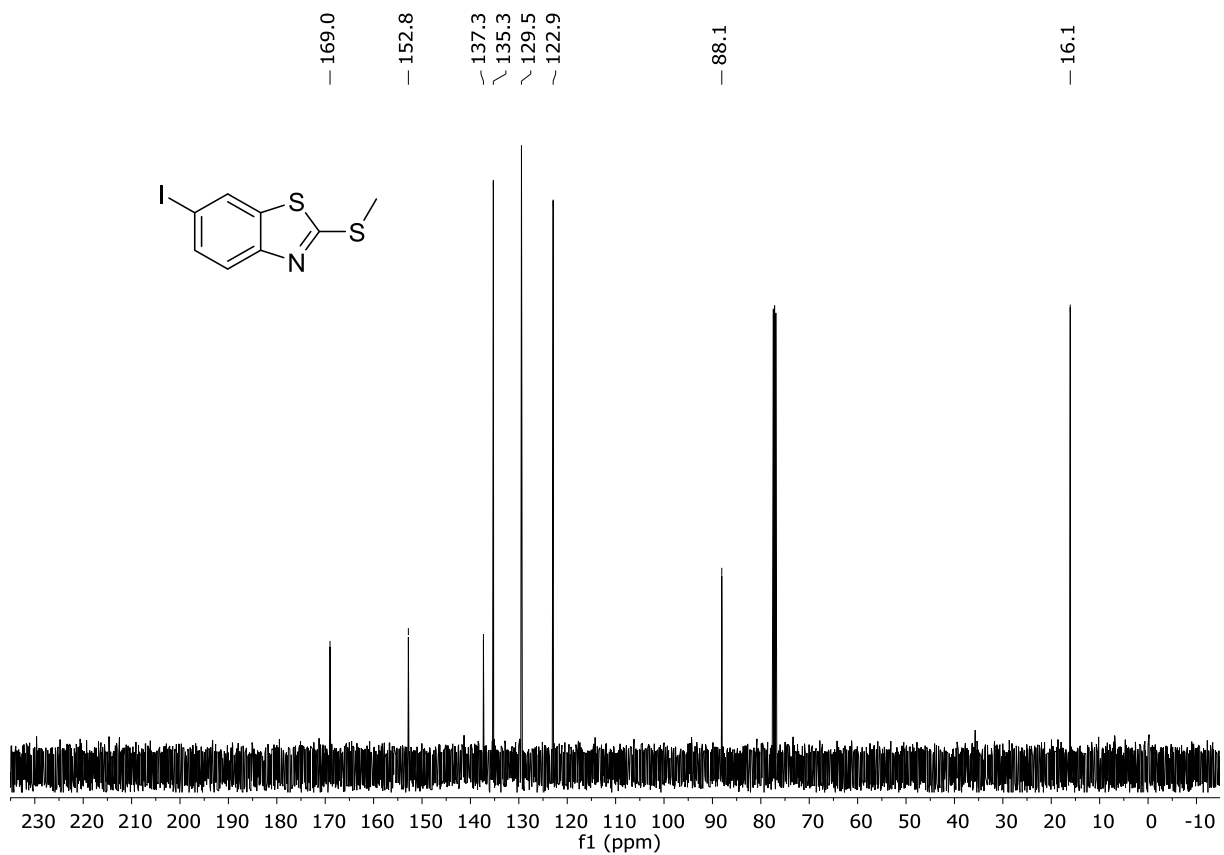

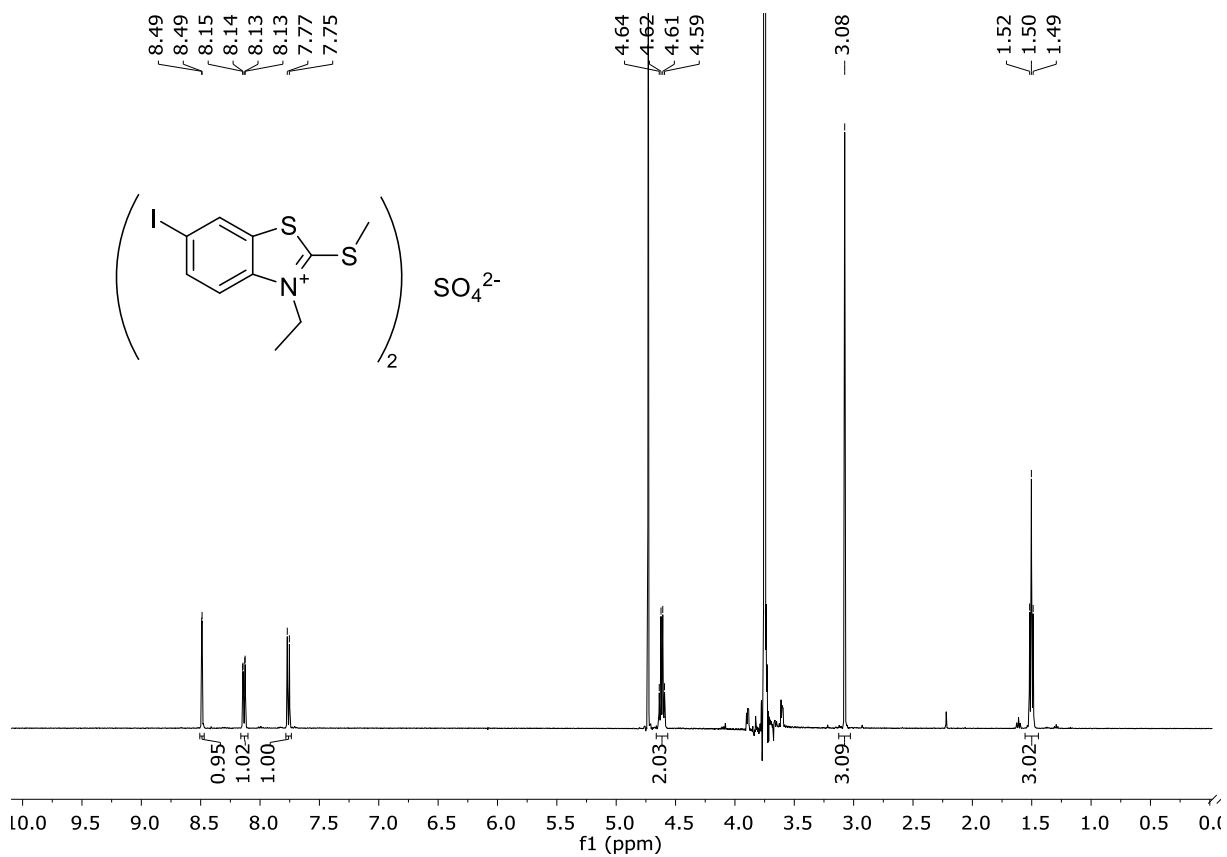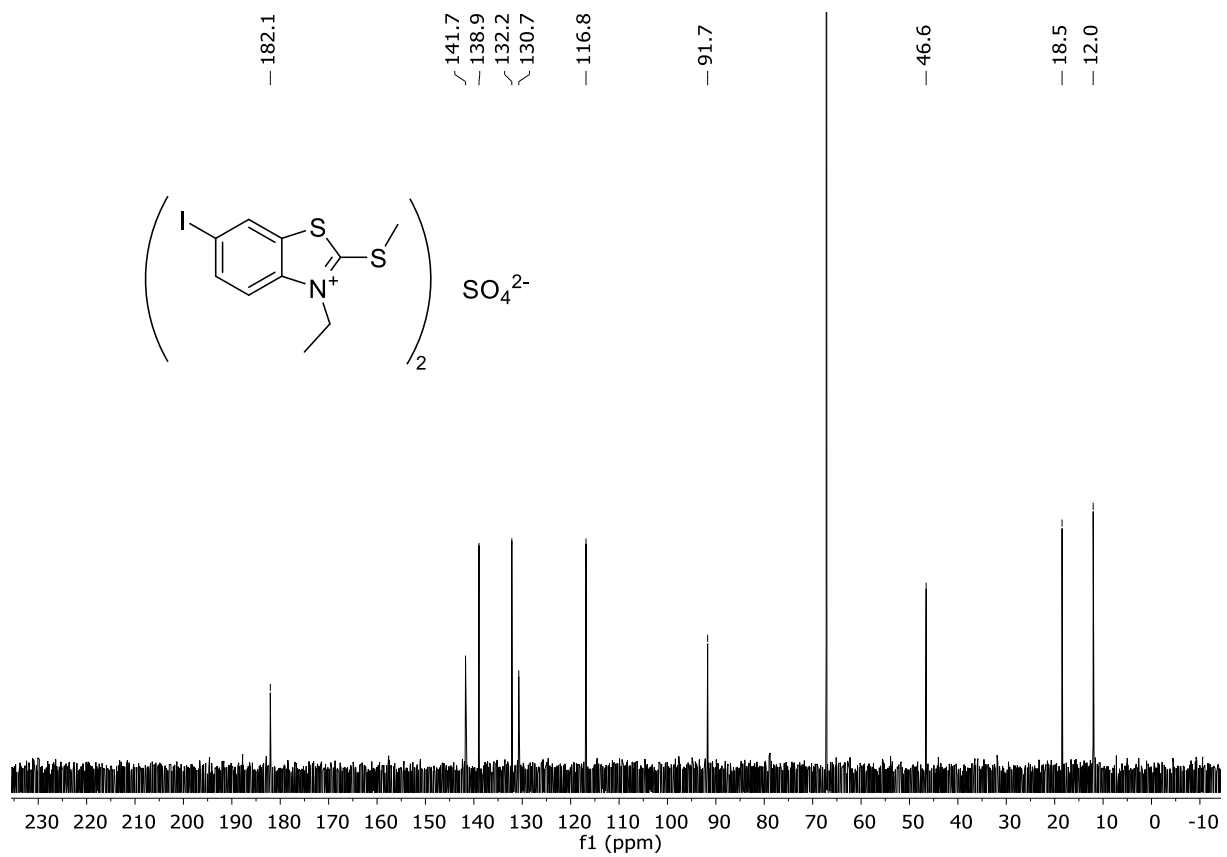

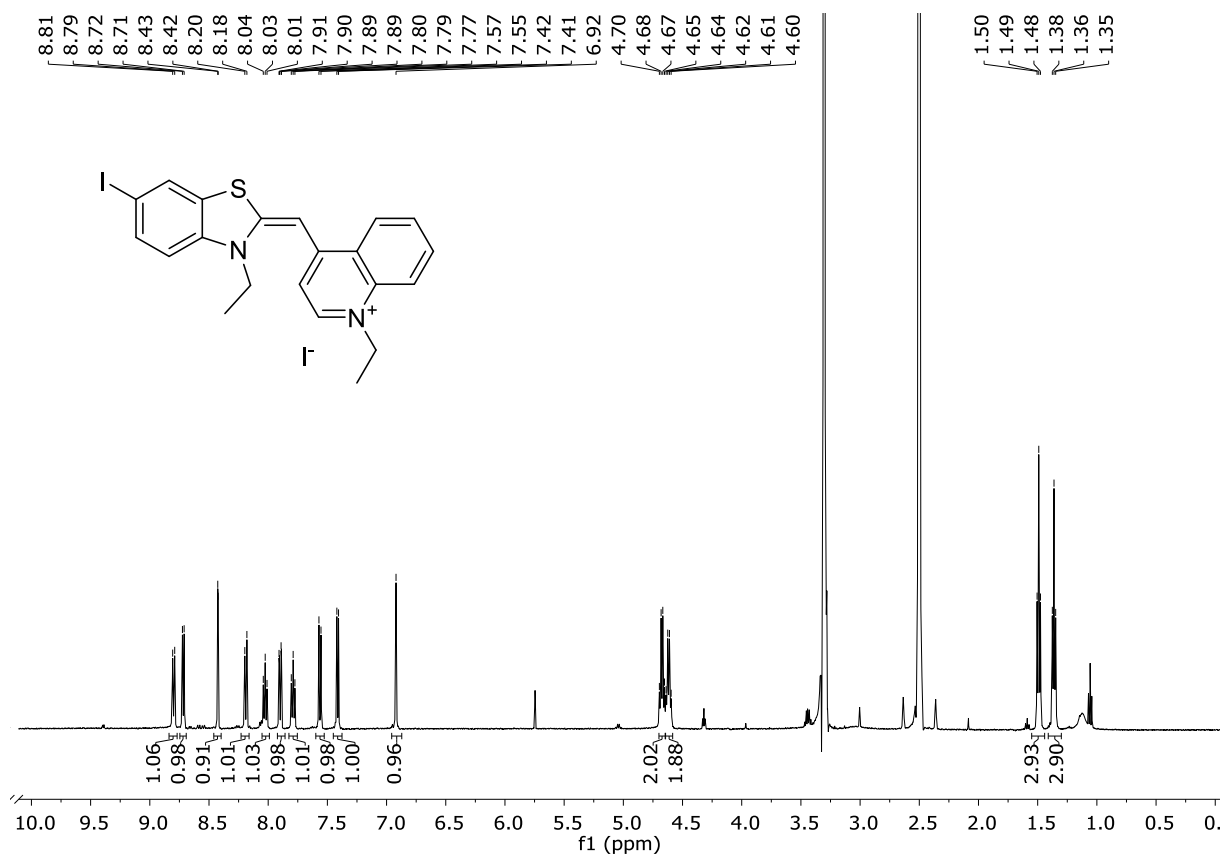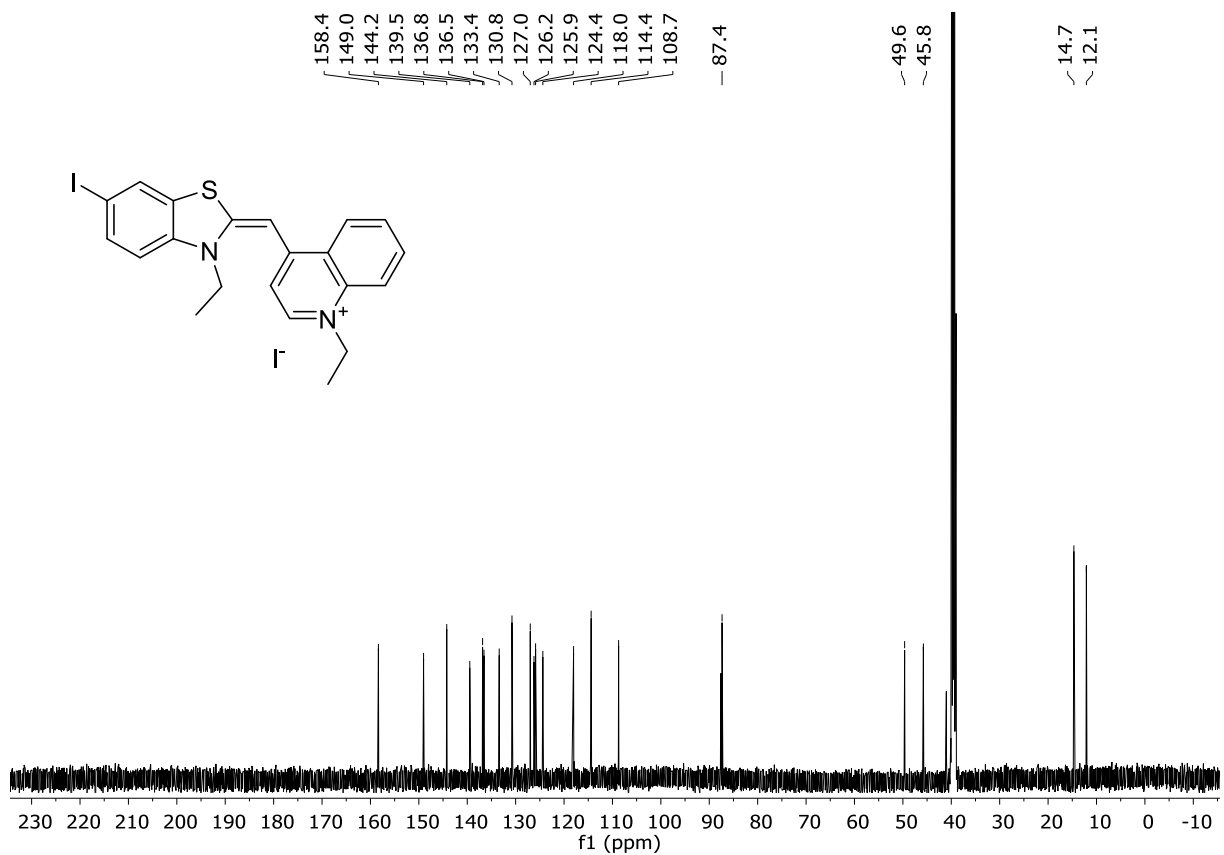

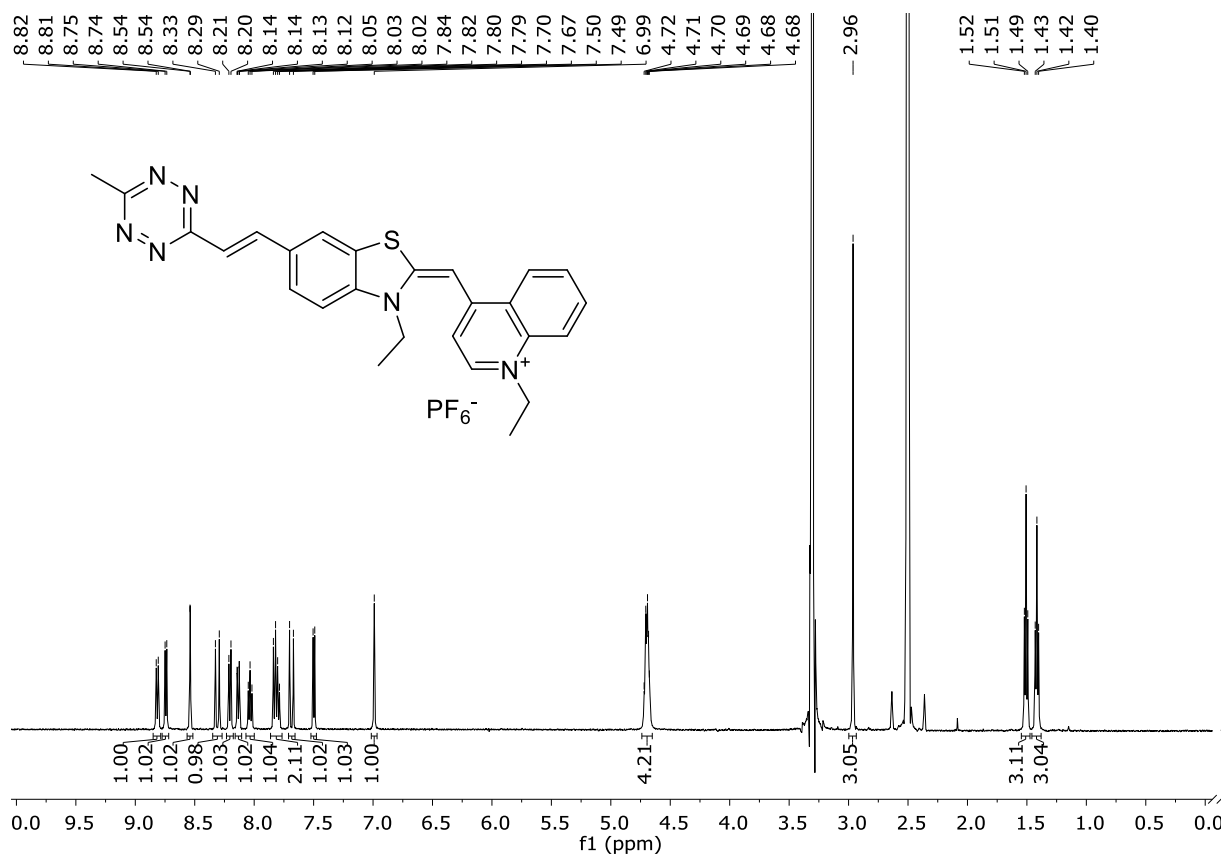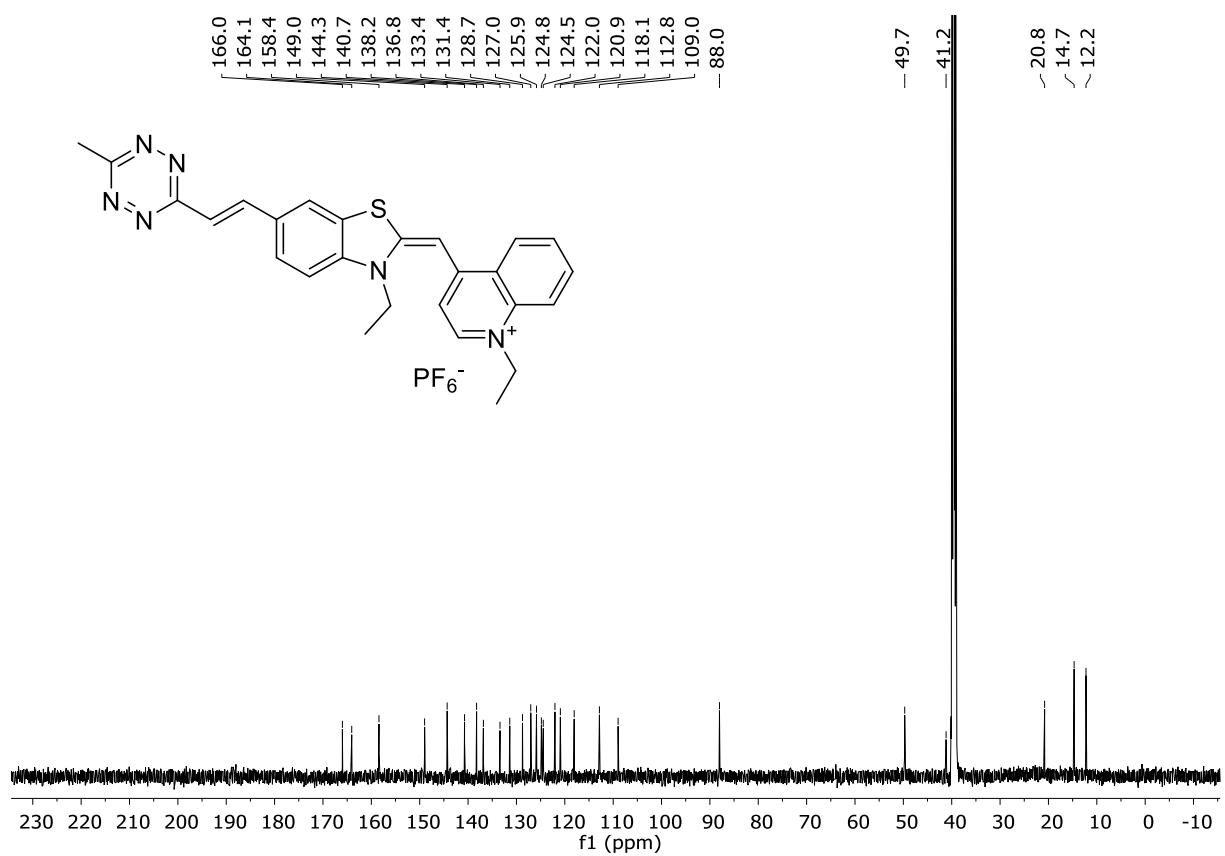

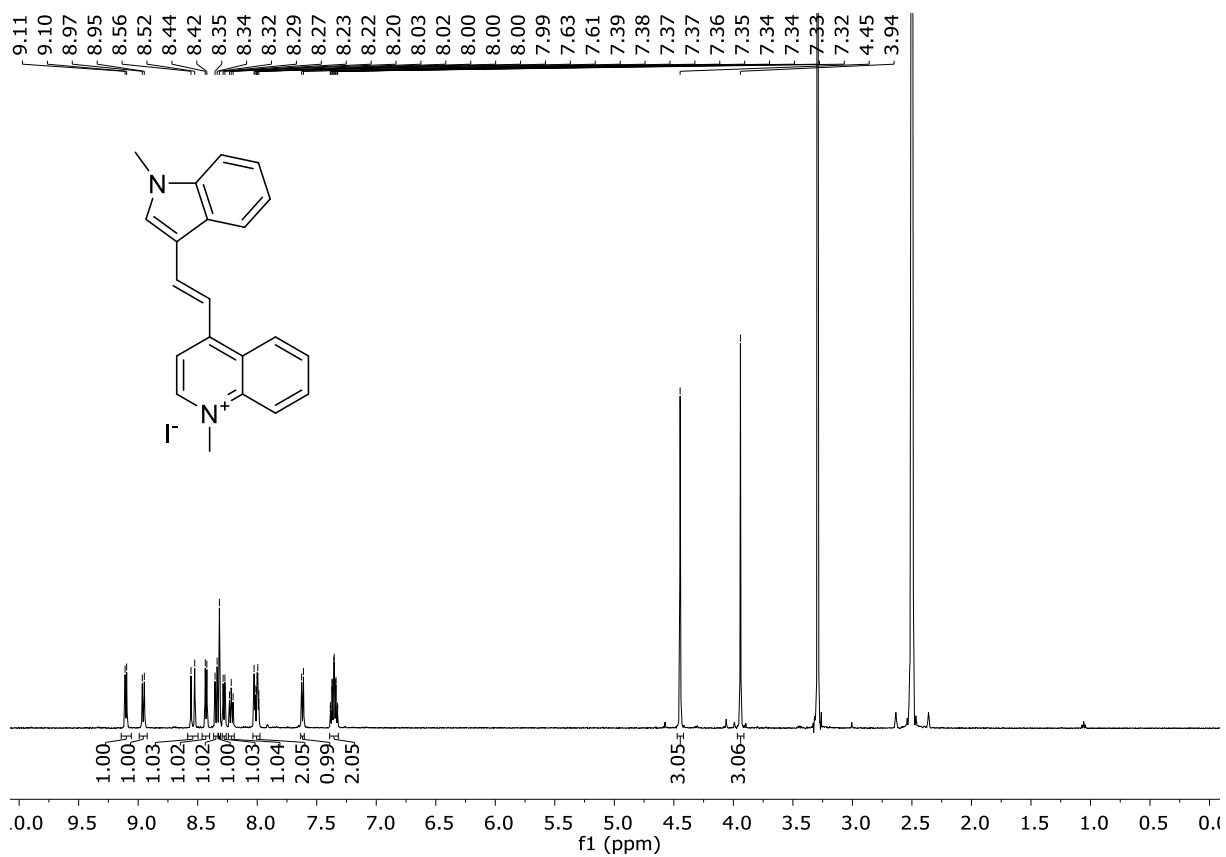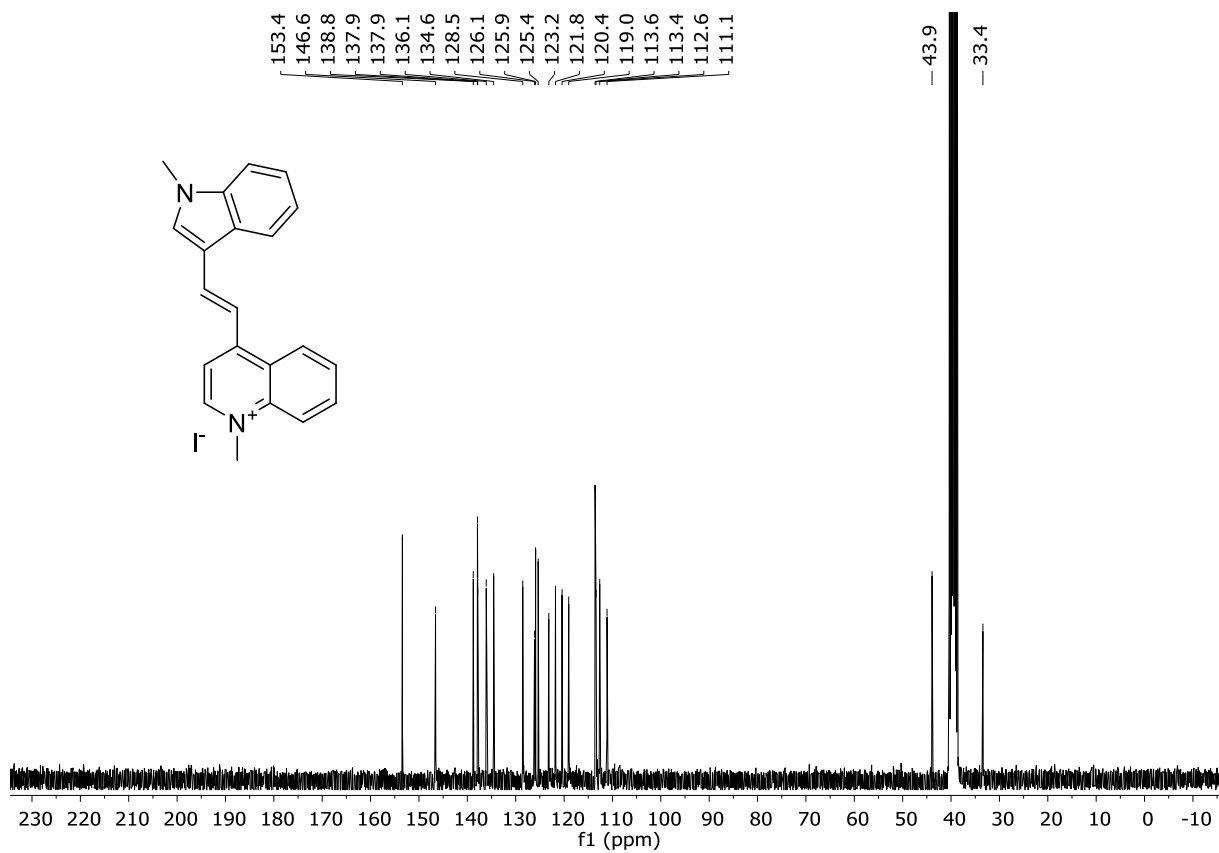

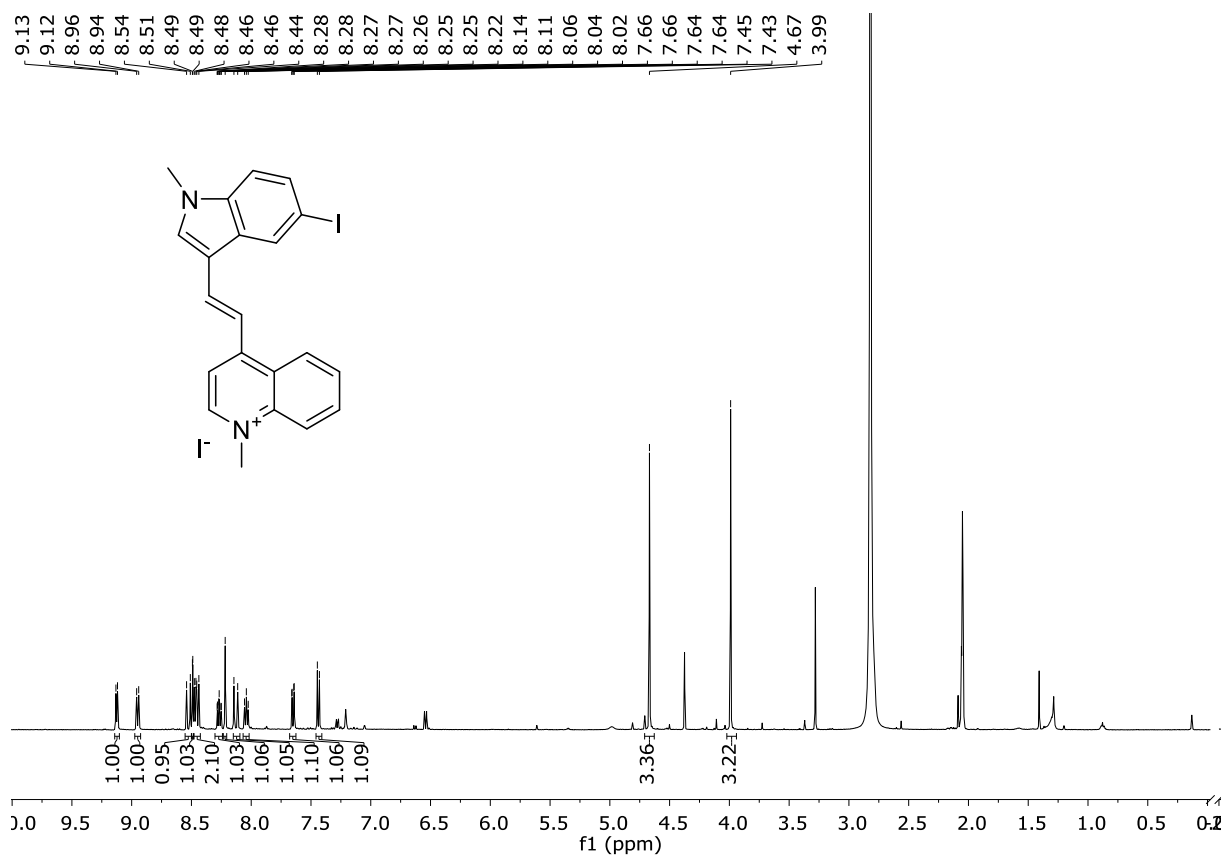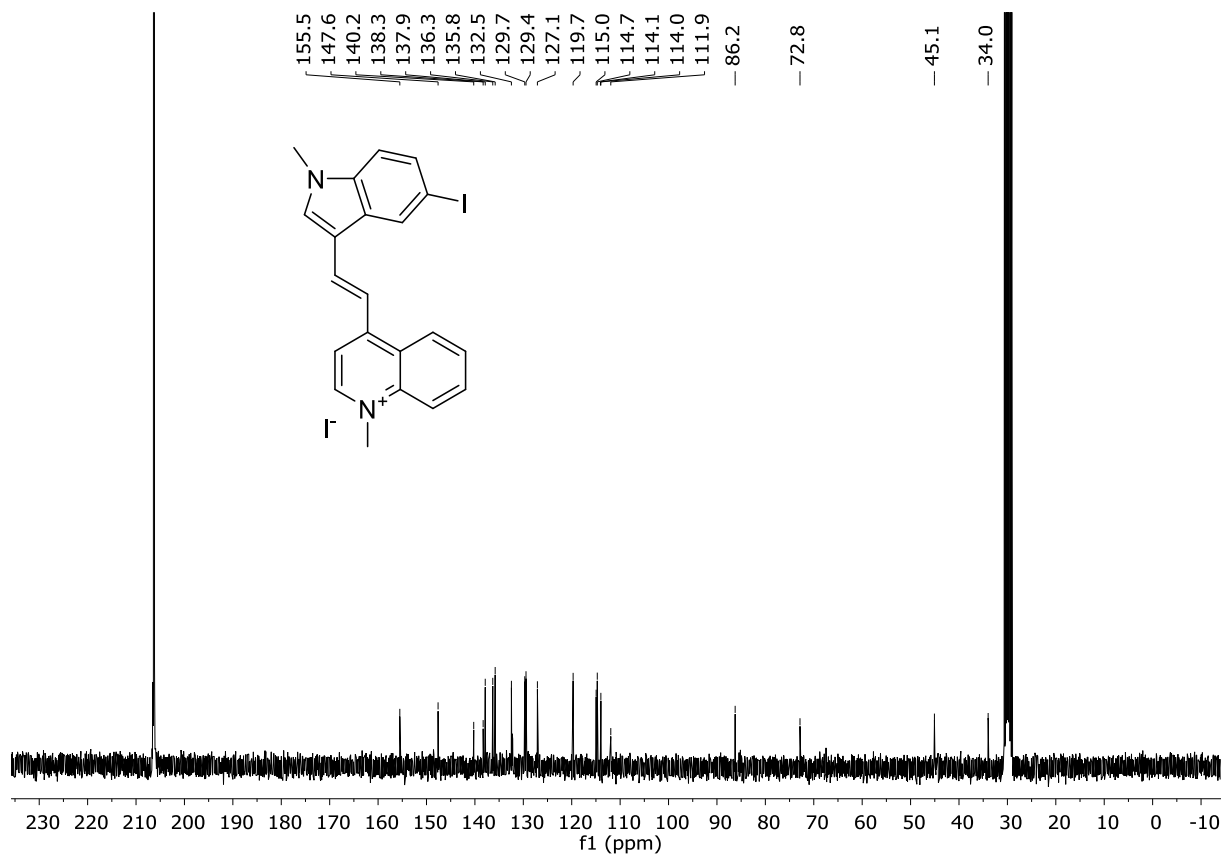

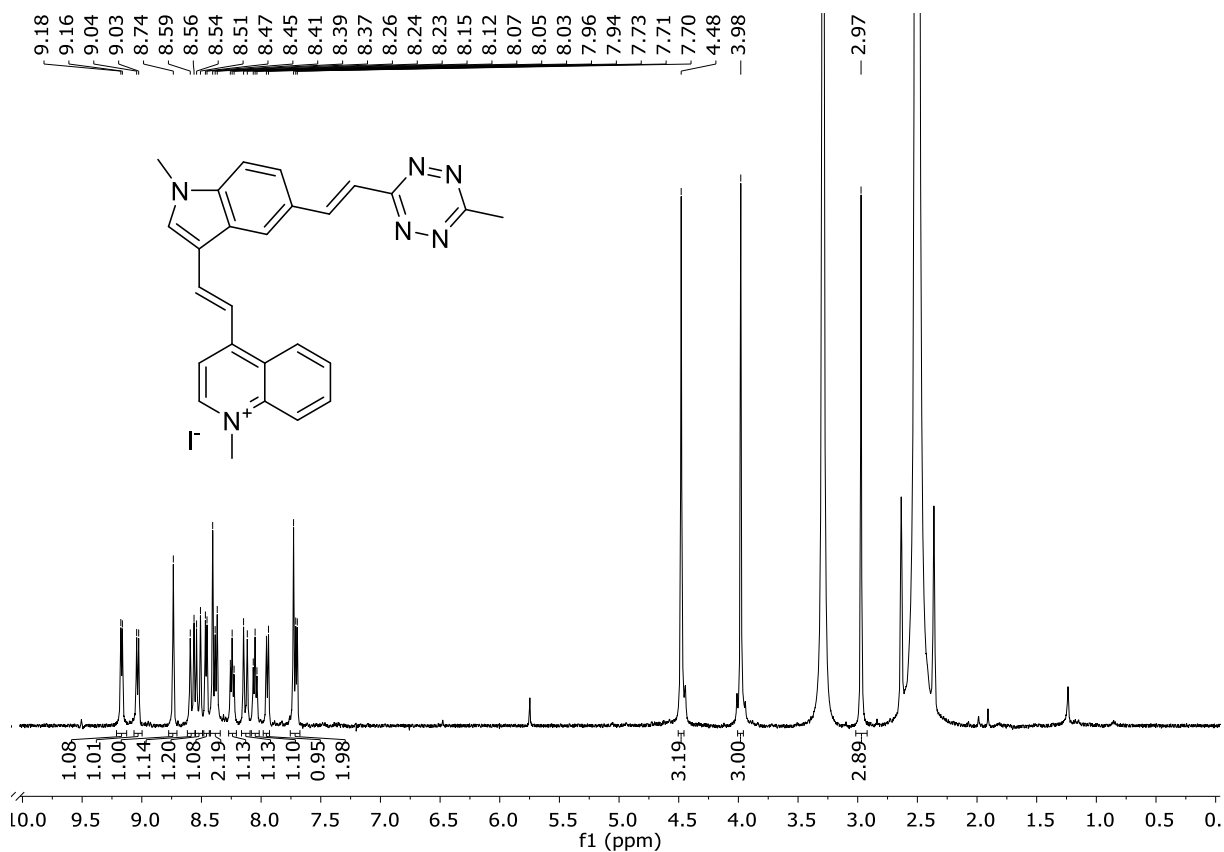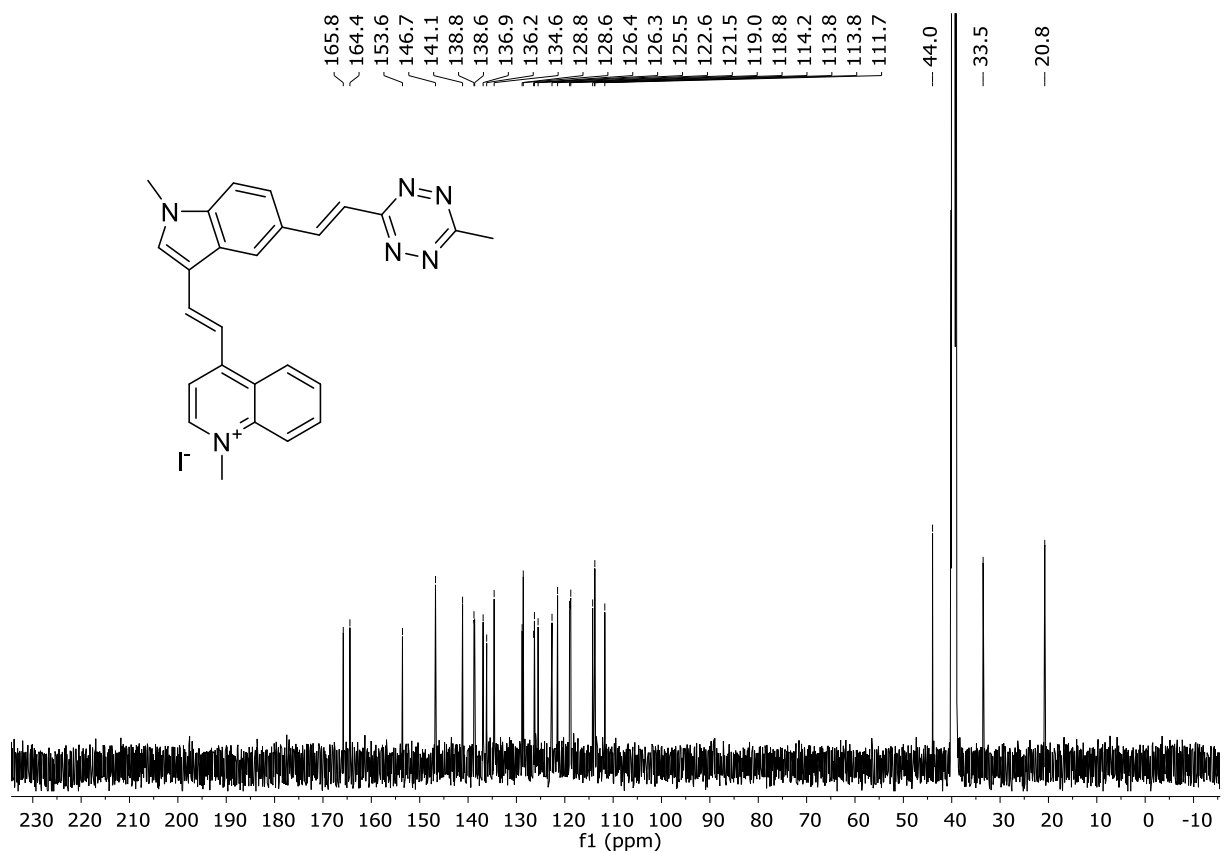

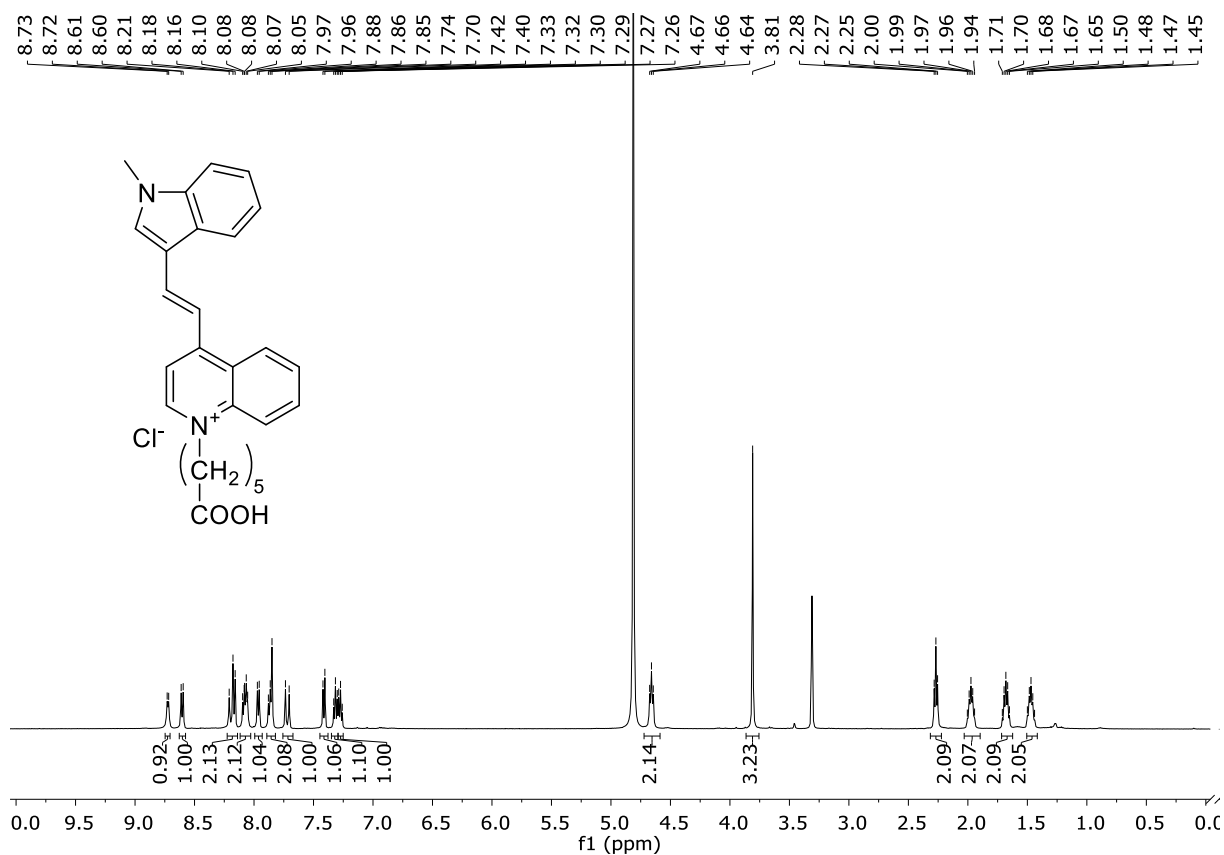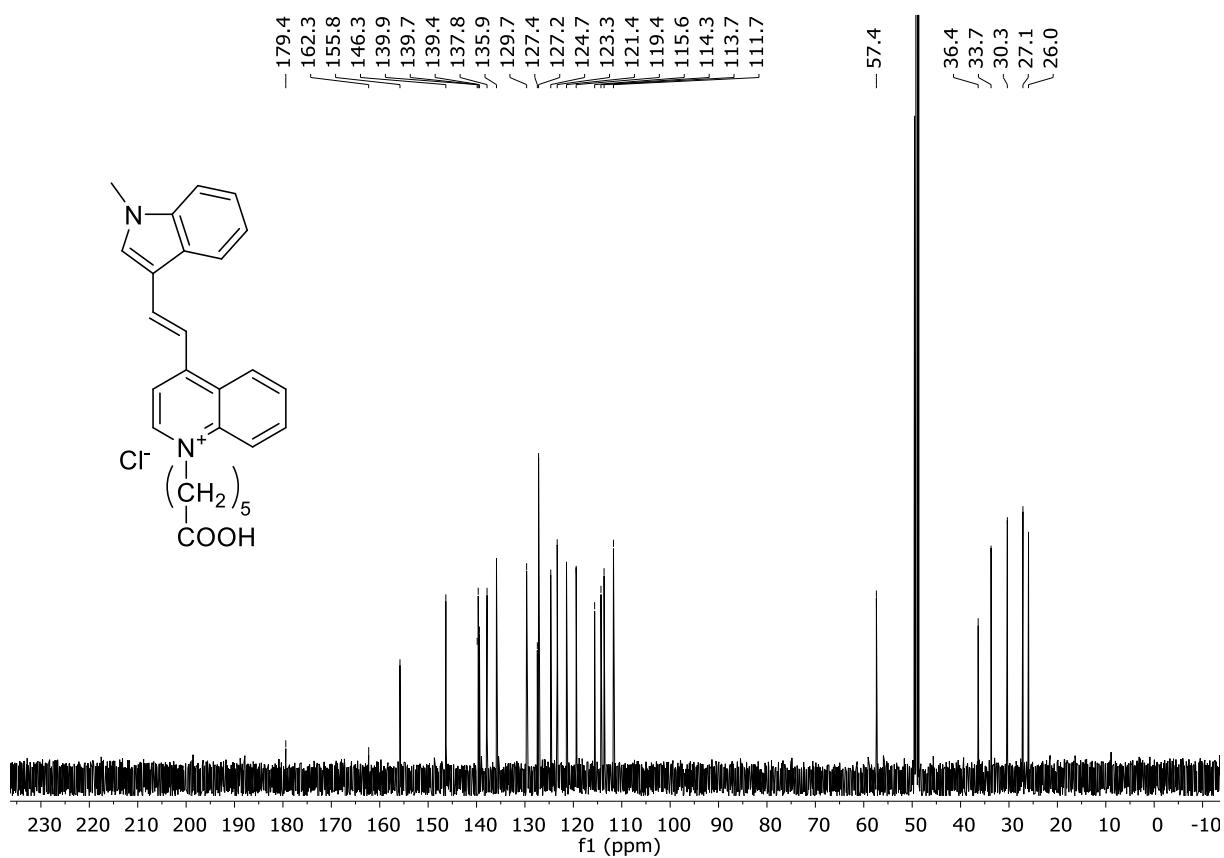

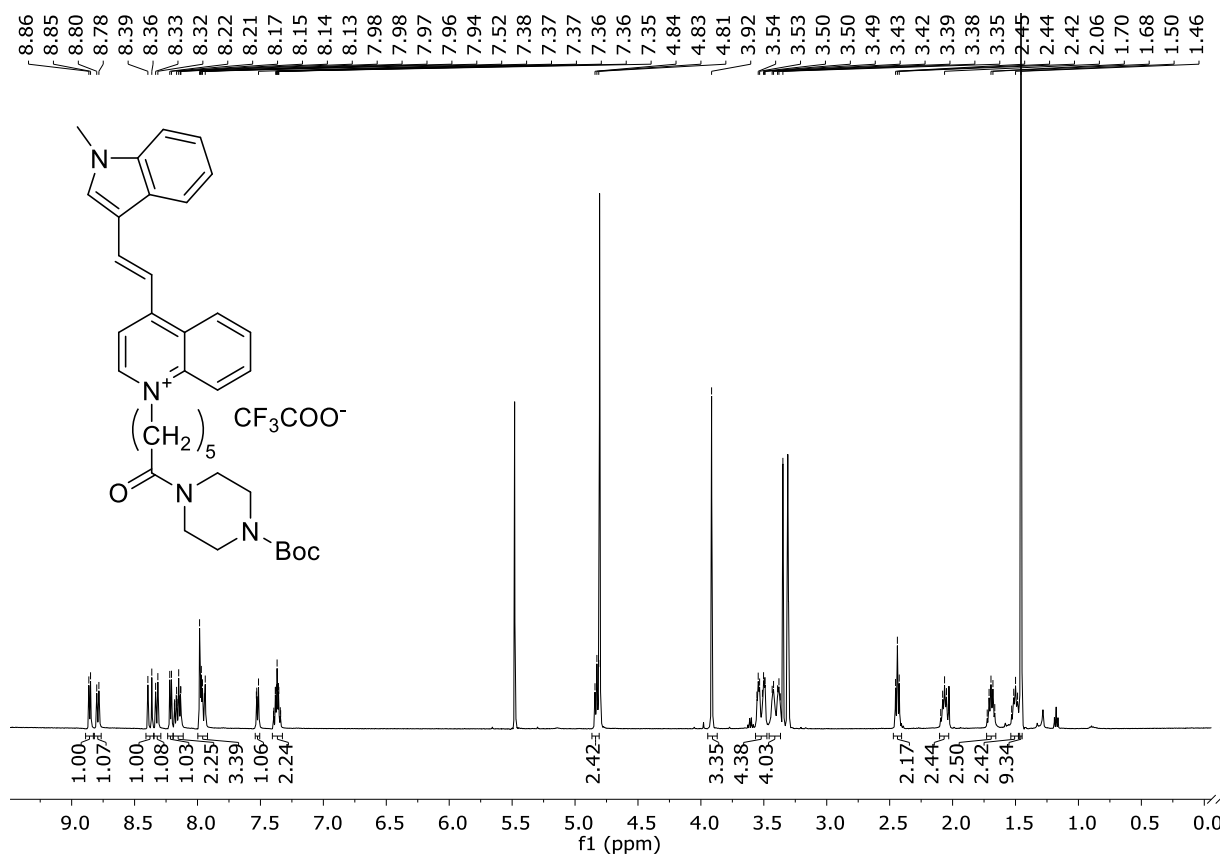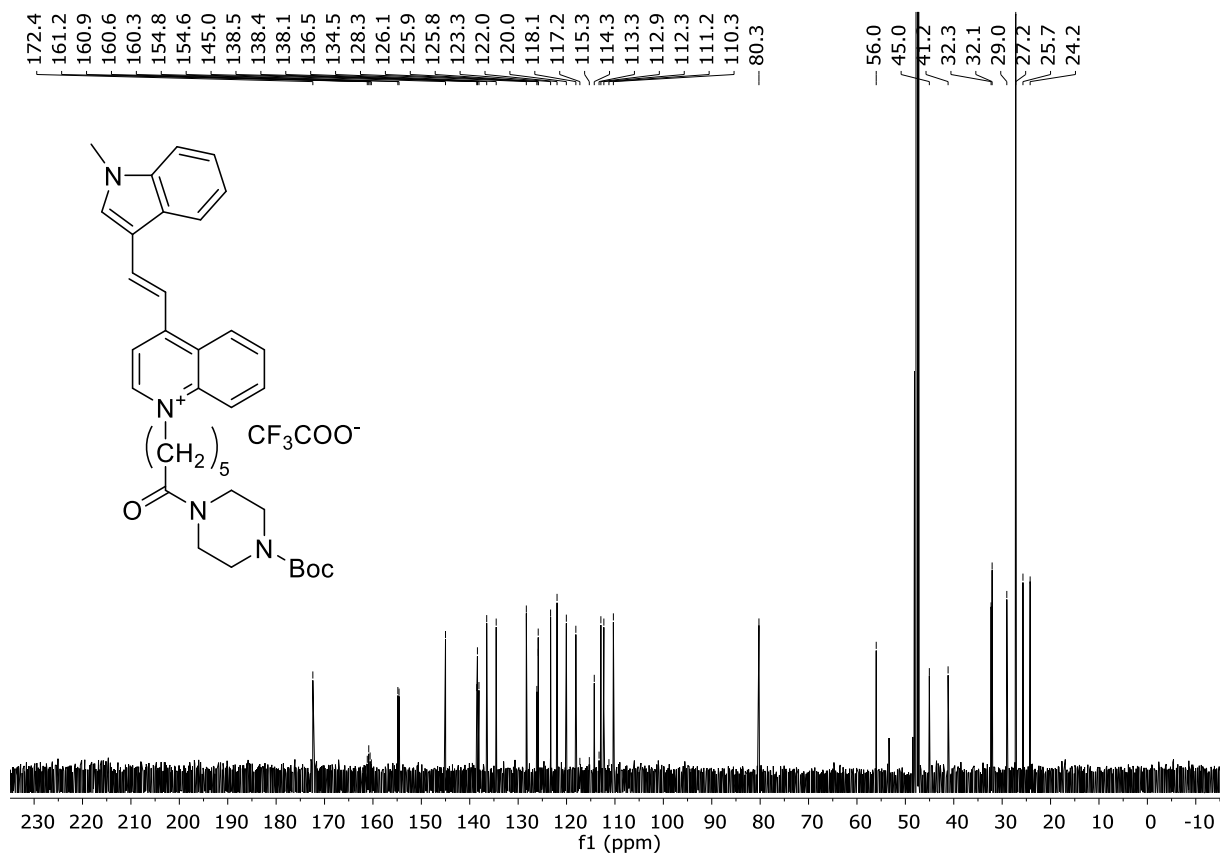

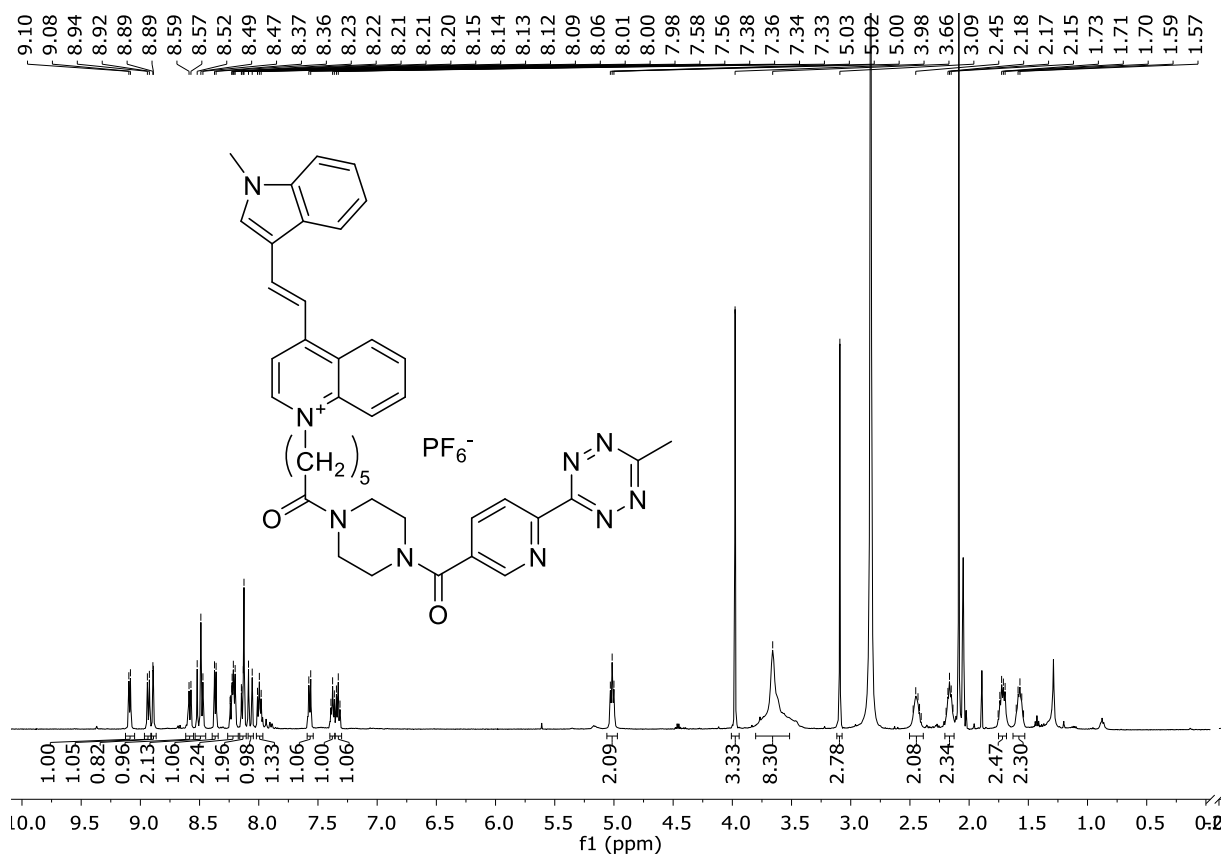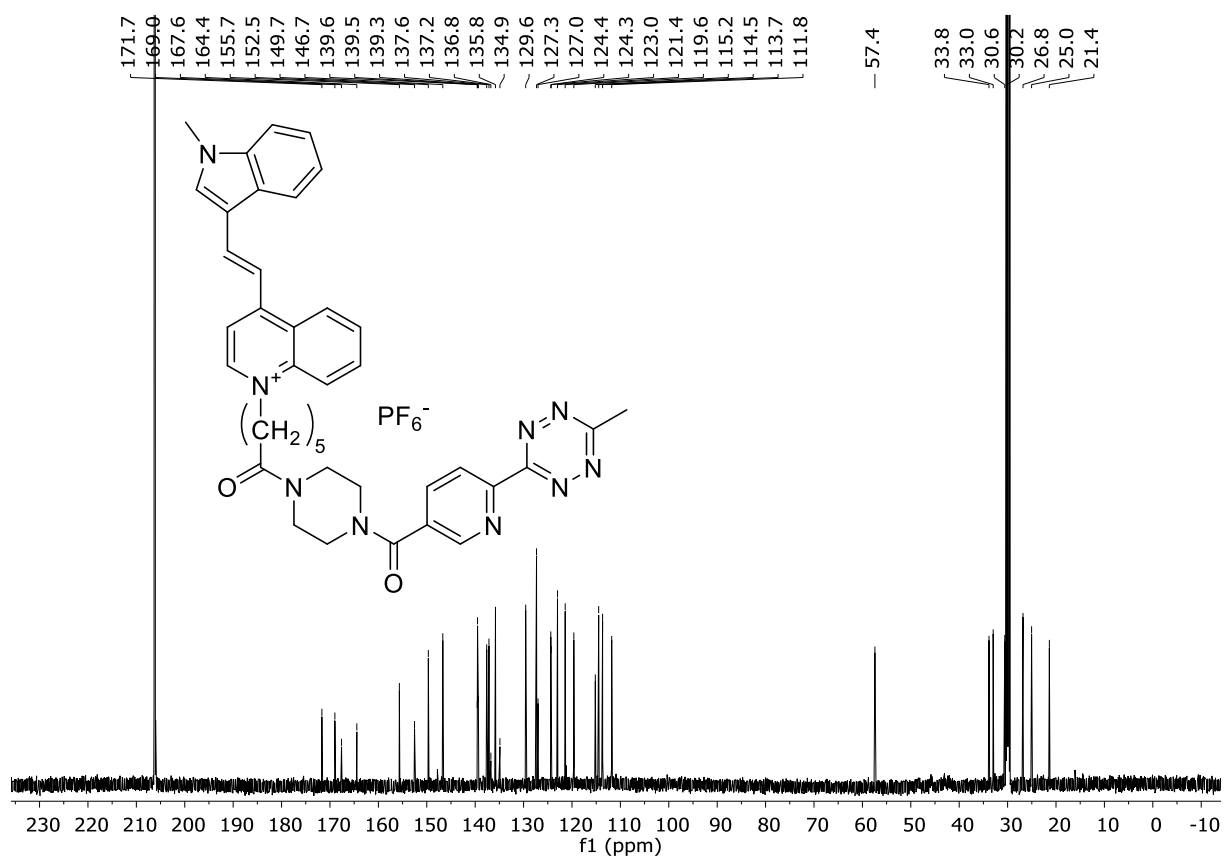

## References

1. Kendall, J. D.; Suggate, H. G. The reactivity of the alkylthio-group in nitrogen ring compounds. Part I. A general method for the preparation of symmetrical and unsymmetrical thiacyanines. *J. Chem. Soc.* **1949**, 1503–1509.
2. Petrovics, R.; Söveges, B.; Egyed, A.; Knorr, G.; Kormos, A.; Imre, T.; Török, G.; Zeke, A.; Kocsmár, É.; Lotz, G.; et al. A rapid and concise setup for the fast screening of FRET pairs using bioorthogonalized fluorescent dyes. *Org. Biomol. Chem.* **2018**, *16*, 2997–3005.
3. Pardal, A. C.; Ramos, S. S.; Santos, P. F.; Reis, L. V.; Almeida, P. Synthesis and spectroscopic characterisation of n-Alkyl quaternary ammonium salts typical precursors of cyanines. *Molecules* **2002**, *7*, 320–330.
4. Winstead, A. J.; Nyambura, G.; Matthews, R.; Toney, D.; Oyaghire S. Synthesis of quaternary heterocyclic salts. *Molecules* **2013**, *18*, 14306–14319.
5. Demeter, O.; Kormos, A.; Koehler, C.; Mező, G.; Németh, K.; Kozma, E.; Takács, L. B.; Lemke, E. A.; Kele, P. Bisazide cyanine dyes as fluorogenic probes for Bis-Cyclooctynylated peptide tags and as fluorogenic cross-linkers of cyclooctynylated proteins. *Bioconjugate Chem.* **2017**, *28*, 1552–1559.
6. Jiang, L.; Lui, Y.-L.; Li, H.; Chan, C.-F.; Lan, R.; Chan, W.-L.; Lau, T. C.-K.; Tsao, G. S.-W.; Mak, N.-K.; Wong, K.-L. EBNA1-specific luminescent small molecules for the imaging and inhibition of latent EBV-infected tumor cells. *Chem. Commun.* **2014**, *50*, 6517–6519.
7. Krasnaya, Z. A.; Kuz'min, V. A.; Litvinkova, L. V.; Dorofeeva, E. O.; Zlotin, S. G. Synthesis of thiacyanine dyes containing coumarin moieties at benzothiazole rings. *Mendeleev Commun.* **2013**, *23*, 212–214.
8. Egyed, A.; Kormos, A.; Söveges, B.; Németh, K.; Kele, P. Bioorthogonally applicable,  $\pi$ -extended rhodamines for super-resolution microscopy imaging for intracellular proteins. *Bioorg. Med. Chem.* **2020**, *28*, 115218.
9. Yang, M.-R.; Qin, Y.-J.; Chen, C.; Zhang, Y.-L.; Li, B.-Y.; Liu, T.-B.; Gong, H.-B.; Wang, B.-Z.; Zhu, H.-L. Synthesis, biological evaluation and molecular docking studies of novel 1-(4,5-dihydro-1H-pyrazol-1-yl)ethanone-containing 1-methylindol derivatives as potential tubulin assembling inhibitors. *RSC Adv.* **2016**, *6*, 30412–30424.
10. Shigeno, M.; Tohara, I.; Nozawa-Kumada, K.; Kondo, Y. Direct C-2 Carboxylation of 3-Substituted Indoles Using a Combined Brønsted Base Consisting of LiO-tBu/CsF/18-crown-6. *Eur. J. Org. Chem.* **2020**, 1987–1991.
11. Mahon Jr., K. P.; Ortiz-Meoz, R. F.; Prestwich, E. G.; Kelley, S. O. Photosensitized DNA cleavage promoted by amino acids. *Chem. Commun.* **2003**, 1956–1957.
12. Cserép, G. B.; Demeter, O.; Bätzner, E.; Kállay, M.; Wagenknecht, H.-A.; Kele, P. Synthesis and evaluation of nicotinic acid derived tetrazines for bioorthogonal labeling. *Synthesis* **2015**, *47*, 2738–2744.
13. Rurack, K.; Spieles, M. Fluorescence quantum yields of a series of red and near-infrared dyes emitting at 600–1000 nm. *Anal. Chem.* **2011**, *83*, 1232–1242.
14. Magde, D.; Wong, R.; Seybold, P. G. Fluorescence quantum yields and their relation to lifetimes of rhodamine 6G and fluorescein in nine solvents: Improved absolute standards for quantum yields. *Photochem. Photobiol.* **2002**, *75*, 327–334.
15. Kozma, E.; Estrada Girona, G.; Paci, G.; Lemke, E. A.; Kele, P. Bioorthogonal double-fluorogenic siliconrhodamine probes for intracellular super-resolution microscopy. *Chem. Commun.* **2017**, *53*, 6696–6699.
16. Szatmári, Á.; Cserép, G. B.; Molnár, T. Á.; Söveges, B.; Biró, A.; Várady, G.; Szabó, E.; Németh, K.; Kele, P. A Genetically Encoded Isonitrile Lysine for Orthogonal Bioorthogonal Labeling Schemes. *Molecules* **2021**, *26*, 4988.
